# Exploring the role of life history traits and introduction effort in understanding invasion success in mammals: A case study of Barbary ground squirrels

Annemarie van der Marel <sup>a</sup>, Jane M. Waterman <sup>a</sup>, Marta López-Darias <sup>b</sup>

<sup>a</sup> *Department of Biological Sciences, University of Manitoba, Winnipeg, Canada*

<sup>b</sup> *Island Ecology and Evolution Research Group, Instituto de Productos Naturales y Agrobiología (IPNA-CSIC), La Laguna, Tenerife, Canary Islands, Spain*

Corresponding author: Annemarie van der Marel, email: [avdmarel@outlook.com](mailto:avdmarel@outlook.com), phone: +1 513 836 4468, *current address*: Department of Biological Sciences, University of Cincinnati, 614 Rieveschl Hall, Cincinnati, OH, USA, 45221-0006

ORCID authors:

van der Marel, A. M.: 0000-0003-3942-8314

Waterman, J. M.: 0000-0003-0027-9067

López-Darias, M.: 0000-0002-7611-1298

1 Abstract

2 Invasive species –species that have successfully overcome the barriers of transport, introduction,  
3 establishment, and spread– are a risk to biodiversity and ecosystem function. Introduction effort  
4 is one of the main factors attributed to invasion success, but life history traits are also important  
5 as they influence population growth. In this contribution, we first investigated life history traits  
6 of the Barbary ground squirrel, *Atlantoxerus getulus*, a species with a remarkably low  
7 introduction effort, and studied whether their exceptional invasion success is due to a very fast  
8 life history profile through a comparison of these traits to other successfully invaded mammals.  
9 We then examined whether number of founders and/or a fast life history influences invasion  
10 success of squirrels. We found that Barbary ground squirrels were on the fast end of the “fast-  
11 slow continuum”, but their life history is not the only contributing factor for their invasion  
12 success, as the life history profile is comparable to other invasive species that do not have such a  
13 low introduction effort. We also found that neither life history traits nor number of founders  
14 explained invasion success of introduced squirrels in general. These results contradict the  
15 concept that introduction effort is the main factor explaining invasion success, especially in  
16 squirrels. Instead, we argue that invasion success can be influenced by multiple aspects of the  
17 new habitat or the biology of the introduced species.

18 *Keywords:* fast-slow continuum, introduction effort, invasive species, life history, population  
19 dynamics

20

21 Introduction

22 Invasive species are a threat to biodiversity and ecosystem function, are an economic  
23 concern, and cause multiple conservation problems (Lodge 1993; Tsutsui et al. 2000; Kolar and

24 Lodge 2001; Allendorf and Lundquist 2003). Introduced species become invasive when they  
25 successfully overcome barriers related to the four different stages of the invasion process (i.e.,  
26 transport, introduction, establishment, and spread; Colautti et al. 2004; Blackburn et al. 2011).  
27 Factors contributing to invasion success, including introduction effort (number of founders  
28 and/or introduction events), habitat, and species characteristics, can differentially impact the  
29 probability for a species to successfully overcome each stage (Blackburn et al. 2011). A greater  
30 number of founders promotes invasion success, as they reduce extinction probability and enable  
31 populations to more readily adapt to new environments (Blackburn et al. 2015), and multiple  
32 introductions increase the probability for genomic admixture and increased fitness (Keller and  
33 Taylor 2010). Habitat characteristics influence invasion success (Lodge 1993; Kolar and Lodge  
34 2001) as they affect the adaptive potential of the introduced species (Le Roux et al. 2008; Vahsen  
35 et al. 2018). Finally, different species characteristics such as explorative and dispersive  
36 behaviour, a generalist character of the species and genetic variation among the introduced  
37 individuals may promote expansion success (Lodge 1993; Kolar and Lodge 2001; Fisher and  
38 Owens 2004; Hayes and Barry 2008; Capellini et al. 2015). In particular, life history traits  
39 promoting population growth are important at two different stages: 1) the introduction stage,  
40 because particularly at first, stochastic events can lead to higher risk of extinction, suggesting  
41 that smaller founding populations with slow population growth may be more susceptible to  
42 extinction risk (Capellini et al. 2015); and, 2) the spread stage, because life history traits  
43 influence population growth, which is essential when dispersing individuals form new  
44 populations in their introduced range (Capellini et al. 2015).

45 Life history strategies of species can be placed along a “fast-slow continuum” (Stearns  
46 1983; Promislow and Harvey 1990; Dobson and Oli 2007a, but see Bielby et al. 2007). Fast

47 species –species with life history traits that accompany rapid population growth, such as early  
48 maturity and frequent and large litters– are generally short-lived with greater fecundity, whereas  
49 species on the slow end of the continuum are long-lived with lower fecundity (Stearns 1983;  
50 Promislow and Harvey 1990; Dobson and Oli 2007b). Nonetheless, species within orders or even  
51 populations within species can show variation along this continuum (Dobson and Oli 2007b, a).  
52 Bat species, for example, may show a combination of life history traits either related to a fast or  
53 slow life history (Culina et al. 2019). In invasion ecology, fast life history traits are suggested to  
54 promote population growth and spread of introduced species, thus favouring species  
55 ‘invasiveness’ (Capellini et al. 2015). Mammals are more likely to be introduced if they have  
56 larger, more frequent litters and a longer reproductive lifespan (Capellini et al. 2015). The  
57 establishment success of introduced mammals depend on larger litters, longer reproductive  
58 lifespan and greater introduction effort, and their spread success is associated with larger, more  
59 frequent litters and higher introduction effort (Capellini et al. 2015). A fast life history influences  
60 not only invasion success in mammals (Capellini et al. 2015, but see Sol et al. 2008), but also in  
61 reptiles, amphibians (van Wilgen and Richardson 2012; Allen et al. 2017), and fishes (Liu et al.  
62 2017). In birds, on the contrary, a slow life history increases the potential to be a successful  
63 invader (Sæther et al. 2004; Sol et al. 2012). Thus, for different species, diverse life history traits  
64 may influence their potential for invasion success.

65         Nevertheless, introduction effort is the major factor amongst those affecting invasion  
66 success (Lockwood et al. 2005; Colautti et al. 2006; Simberloff 2009; Blackburn et al. 2015).  
67 Thus, both fast life history traits and a high introduction effort contribute to the probability for  
68 established species to successfully spread in the new range (Capellini et al. 2015; Allen et al.  
69 2017). However, the role of introduction effort in explaining species invasiveness could be

70 difficult to interpret in certain taxonomic groups, such as squirrels, as some species are known to  
71 be successful invaders without a high introduction effort. For example, in 71.4% of successful  
72 invasions of grey squirrels, *Sciurus carolinensis*, the number of founders did not explain invasion  
73 success because fewer than ten individuals were released (Wood et al. 2007; Lawton et al. 2010).  
74 Also in the Pallas's squirrel, *Callosciurus erythraeus*, and the Finlayson's squirrel, *Callosciurus*  
75 *finlaysonii*, the number of founders did not prevent them from establishing in their introduced  
76 ranges, as fewer than seven individuals were released (Bertolino 2009; Bertolino and Lurz 2013;  
77 Benitez et al. 2013).

78 We used the Barbary ground squirrel as an exemplar of a species whose introduction  
79 effort is extremely low, as only two individuals from Morocco were introduced in 1965 to the  
80 island of Fuerteventura, Canary Islands, Spain (Machado 1979; Kratzer et al. 2020). In 37 years,  
81 the Barbary ground squirrel spread across the entire island, favoured by five translocation  
82 accounts from the original founder locality to new localities on the island (Machado 1979;  
83 Machado and Domínguez 1982; López-Darias, unpubl. data). Since the introduction, their  
84 population has grown to an estimated one million animals (López-Darias 2007) despite low  
85 genetic diversity and a small effective population size of 77 individuals (Kratzer et al. 2020). The  
86 species has negative ecological, economical, and public health impacts. They consume native  
87 and endemic snails (Machado and Domínguez 1982; Groh and García 2004; López-Darias  
88 2007), prey upon some critically endangered species (Bañares et al. 2003) and feed upon the  
89 eggs of small native and endemic passerine birds (López-Darias 2007). Their ecological impacts  
90 go beyond direct predation upon species, as they directly alter plant-animal interactions of  
91 fleshy-fruited plant species and ruderal weeds, including herbaceous plants of native or  
92 introduced origin (López-Darias and Nogales 2008, 2016). Although reliable studies are lacking,

93 Barbary ground squirrels may compete with the endemic shrew, *Crocidura canariensis* (López-  
94 Darias 2008), listed as vulnerable by the IUCN (Hutterer 2008). Additionally, these ground  
95 squirrels carry parasites that impact native fauna as well as public health (Lorenzo-Morales et al.  
96 2007; López-Darias et al. 2008), and cause damage to agricultural activities (Machado and  
97 Domínguez 1982; López-Darias 2007). Moreover, these ground squirrels alter the population  
98 dynamics of predators in two ways (López-Darias 2007). First, the ground squirrels are the main  
99 prey of an endemic subspecies of Eurasian buzzard, *Buteo buteo insularum*, whose population  
100 has increased on Fuerteventura in the last 40 years possibly because they prey upon this  
101 abundant, new prey (Gangoso et al. 2006; López-Darias 2007). Second, the ground squirrels  
102 positively impact invasive feral cat populations (Medina et al. 2008). Despite the notable  
103 invasion success of the species on the island, nothing is known about the life history traits that  
104 could have influenced their population growth.

105         The objective of this manuscript is three-fold. First, we investigated life history traits of  
106 the Barbary ground squirrel, *Atlantoxerus getulus*, a species with a remarkably low introduction  
107 effort (Machado 1979; Kratzer et al. 2020). Second, we studied whether the Barbary ground  
108 squirrel's exceptional invasion success (despite low introduction effort) is due to a very fast life  
109 history profile through a comparison of these traits to other successfully invaded mammals using  
110 the dataset provided by Capellini et al. (2015). Third, we examined whether number of founders  
111 and/or a fast life history influences invasion success of squirrels using the dataset provided by  
112 Bertolino (2009). Our results will contribute to our understanding of invasion success when  
113 introduction efforts are minimal and will be essential to plan for future conservation programs on  
114 this species, as knowing life history traits parameters of the species, such as when females come  
115 into estrus or if they can breed year-round, is core to better plan control programs. As well, our

116 research put the life history traits in a broader comparative context to understand their  
117 contribution and that of introduction effort to invasion success in squirrels.

118

119 Methods

120 *Life history traits of invasive Barbary ground squirrels*

121 Of the Canary Islands' seven main volcanic islands, Fuerteventura is the closest to the  
122 African continent (approximately 100 km away), the oldest, and has the second lowest altitude  
123 (807 m a.s.l.). The island has an arid climate –high temperatures ( $\approx 20^\circ\text{C}$ ) and low rainfall (on  
124 average  $< 100$  mm/year)– characterised by trade winds, which have resulted in a semi-desert  
125 habitat (López-Darias and Lobo 2008). We studied the invasive population of Barbary ground  
126 squirrels in the northwest of Fuerteventura ( $28^\circ34'60''$  N,  $13^\circ58'0''$  W). Stony plains with  
127 xerophytic scrubland, interspersed with ravines caused by erosion and abandoned cultivated  
128 areas that are fenced by man-made rock walls and dams characterise our study site.

129 The semifossorial Barbary ground squirrel is a social species: adult females share  
130 sleeping burrows with other related females and males share sleeping burrows with unrelated  
131 males and subadults of either sex (van der Marel et al. 2020). Throughout the day, both male and  
132 female groups can be active in the same area (van der Marel et al. 2020).

133 To determine life history traits of the species, we trapped Barbary ground squirrels using  
134 live traps (Tomahawk Co., WI, U.S.A.; 13 x 13 x 40 cm) baited with peanut butter during three  
135 consecutive years (February through July 2014, January through July 2015, and January through  
136 June 2016) following the procedures described in van der Marel et al. (2019, 2020). Upon  
137 capture, we transferred squirrels to a conical handling bag (Koprowski 2002), where every adult

138 squirrel received a passive integrated transponder (PIT) tag (Avid Identification Systems, Inc.,  
139 Norco, CA, U.S.A.) for individual identification.

140 We first assessed whether there was a distinct breeding season in the Barbary ground  
141 squirrels by regularly trapping and observing male (2014:  $n = 32$ , 2015:  $n = 52$ , 2016:  $n = 55$ )  
142 and female (2014:  $n = 40$ , 2015:  $n = 69$ , 2016:  $n = 82$ ) reproductive progress. We reported the  
143 reproductive status of adult males through the year from non-scrotal to descending scrotum, fully  
144 scrotal, and regressing scrotum. Subadult males (2014:  $n = 8$ , 2016:  $n = 1$ ) were those individuals  
145 that have reached adult body size, were over six months old, but did not have descended testes  
146 (Waterman 1996). Female subadults (2014:  $n = 6$ ) were individuals that have reached adult body  
147 size, were over six months of age, but their vulva and nipples were not swollen during the mating  
148 season (indicative of no reproduction). We assessed the reproductive progress of adult females by  
149 measuring gestation length from oestrus date until parturition date. We estimated the day of  
150 oestrus following previous recommendations by Pettitt et al. (2008) and Waterman (1996).  
151 Lactation length was measured from the day of parturition to the day of juvenile emergence. We  
152 determined the day of parturition by trapping and weighing the females more extensively around  
153 their expected parturition date and by palpating their lower abdomen for embryos. The nipples of  
154 immature (subadult) females are small but after their first successful parturition, the nipples  
155 elongate and swell during lactation. Large bite marks surrounding the nipples indicated the  
156 weaning period. We calculated the weaning age from the day of juvenile emergence until the bite  
157 marks around the nipples of the mothers started to subside. After weaning, the nipples of adult  
158 females stay elongated but not swollen (Waterman 1996). We estimated age at first birth in  
159 females with known date of birth ( $n = 8$ ). As our sample size was small, we also estimated age at  
160 first birth in females with unknown day of birth but instead with known date of emergence. For



161 these females, we added the average lactation length to the date of emergence to acquire their age  
162 at first birth. We only used females, because we were certain they had mated due to the swelling  
163 of their vulva and presence of copulatory plugs. As age at first birth violated the assumptions of  
164 the normality and homoscedasticity of a parametric test, we tested for a difference in our two  
165 estimates (females with known date of birth vs females with known date of juvenile emergence)  
166 using a Mann-Whitney *U* test.

167 To locate nest burrows of adult pregnant females, we fitted them with radio collars (3.6 g  
168 PD-2C transmitters, Holohil Systems Ltd., Carp, Ontario, Canada) just prior to juvenile  
169 emergence. We radiotracked the females using an R-1000 telemetry receiver (Communications  
170 Specialists, Inc., Orange, CA, U.S.A.) and a Yagi antenna model F150-3FB (Advanced  
171 Telemetry Systems, Inc., Isanti, MN, U.S.A). Upon juvenile emergence, we extensively trapped  
172 at nest burrows to sex, measure, and mark the juveniles (individuals newly emerged from their  
173 nest burrow up to six months of age) with ear tags (#1005 Size 1 Monel, National Band and Tag  
174 Co., Newport, KY, U.S.A.). We also determined litters per year and litter size. We used a  
175 Kruskal-Wallis test to analyse differences in average litter size across years. We calculated litter  
176 sex ratio as the proportion of male juveniles out of the total emerged juveniles (Charnov 1982;  
177 Ryan et al. 2012), which we analysed using a chi-square test of independence. We tested whether  
178 litter sex ratio differed from parity using an exact binomial test. Using a chi-square test of  
179 independence, we analysed differences in juvenile survival rate measured as the proportion of  
180 emerged juveniles that survived to one month. Occasionally, mothers merged their litters with the  
181 litters of other adult females before all juveniles were trapped and marked, resulting in unmarked  
182 juveniles at a communal burrow. These litters were excluded because we were uncertain of the  
183 identity of the mothers. Finally, we calculated maternal success rate as the proportion of females

184 successfully raising their litter to emergence and used a chi-square test of independence to test  
185 for differences in maternal success rate.

186 We were unable to measure neonatal body mass in the field because the females give  
187 birth within their nest burrow, therefore we used neonatal body mass recorded during an earlier  
188 study with the Barbary ground squirrels on Fuerteventura (mean  $\pm$  SE = 8.1  $\pm$  0.5 g,  $n = 5$   
189 juveniles; Machado and Domínguez 1982). We measured adult body mass using a spring scale ( $\pm$   
190 5 g; Pesola AG, Baar, Switzerland) and focused on masses outside of the reproductive period,  
191 selecting males that were non-scrotal and females prior to the breeding season or after their  
192 offspring were weaned. We measured average adult lifespan for individuals of known age and for  
193 individuals of uncertain age, thus, individuals that did not survive into adulthood were excluded.  
194 We tested for sex differences in average lifespan using Mann-Whitney  $U$  tests. We calculated  
195 adult survival as the proportion of adults in a group that were trapped in the following field  
196 season (January 2015, 2016, and 2017). We censored adult survival for squirrels that were  
197 already adults in our first field season and were still alive in our last field season, i.e., squirrels  
198 with uncertain age. We performed the Kaplan-Meier approach on our censored data using the  
199 ‘Survival’ package version 2.43-1 (Therneau and Grambsch 2000; Therneau 2015). Reproductive  
200 lifespan was calculated from the maximum lifespan/longevity (5.0 year) reported in Aulagnier et  
201 al. (2013) transformed into days and age at first birth in days following Capellini et al. (2015).

202 To understand the contribution of life history traits and introduction effort to invasion  
203 success, we questioned whether the Barbary ground squirrel's exceptional invasion success  
204 (despite low introduction effort) is due to a very fast life history profile. We compared the life  
205 history profile of the Barbary ground squirrel population to the life histories of other invasive  
206 mammals and other invasive squirrels using the dataset provided by Capellini et al. (2015).

207 All applicable institutional and/or national guidelines for the care and use of animals  
208 were followed. All procedures conformed to the guidelines of the American Society of  
209 Mammalogists for the use of wild mammals in research, were approved by the University of  
210 Manitoba Animal Care and Use Committee (protocol #F14-032), and were permitted by the  
211 government of Fuerteventura (Cabildo Insular de Fuerteventura #14885). We performed all the  
212 statistical analyses with alpha set to 0.05 in R version 3.5.1 (R Core Team 2017). We reported the  
213 mean  $\pm$  standard error (*SE*).

214

### 215 *Life history vs introduction effort in explaining invasion success of squirrels*

216 We used a Bayesian Phylogenetic Multilevel Model to test the impact of life history traits  
217 (longevity, body mass, gestation length, weaning age, litter size, litters per year, age at first birth,  
218 and reproductive lifespan) and introduction effort (number of founders and times introduced) on  
219 the invasion status of squirrels (Bertolino 2009). For our phylogeny, we selected the squirrel  
220 species reported in Bertolino et al. (2009) from a mammalian supertree provided by Rolland et  
221 al. (2014). In our model, we used invasion status (successfully spread or not; Bernoulli  
222 distribution) as our dependent variable. We tested for collinearity between our variables using the  
223 variance inflation factor (VIF) function from the ‘CAR’ package version 3.0-2 (Fox and  
224 Weisberg 2011) and excluded covariates with the variance inflation factor (VIF) above three. We  
225 included number of founders, weaning age, litters per year, and age at first birth as our covariates  
226 (ESM 1) and standardised these variables. We used species as random factor to account for any  
227 effects that are independent of the phylogenetic relationship between species as we had multiple  
228 introduction events per species ( $n = 8$  species ranging between 1 and 28 introduction events with  
229 878 data points in total, Bertolino 2009). We also accounted for phylogenetic signal between

230 species. We ran two models, one without added variability of the independent variables within  
231 species and one with it. As only the number of founders was variable per species, we only had to  
232 account for this covariate. We used the ‘get\_prior’ function to set our prior. As settings for our  
233 model, we used three chains, two cores, 10000 iterations, and 1500 as the warmup (burnin), and  
234 we set the ‘adapt\_delta’ to 0.99. We visually inspected for model convergence and we assessed  
235 mixing by ensuring that the effective sample sizes for all parameters were above 1000. We  
236 selected the model with the lowest loo information criterion (Vehtari et al. 2017). We assessed  
237 the influence of each independent variable on invasion status by analyzing whether the posterior  
238 distribution crosses zero. If the posterior distribution of the parameter estimates ( $\beta$ ) crosses zero  
239 then that variable has a negligible effect on the dependent variable, whereas if it substantially  
240 shifted from zero then that variable has an influential effect. For this analysis, we used the R  
241 package ‘brms’ (Bürkner 2017, 2018) from the Stan environment (<http://mc-stan.org/>). We  
242 performed the statistical analyses in R version 4.0.1 (R Core Team 2020).

243

## 244 Results

### 245 *Life history traits of invasive Barbary ground squirrels*

246       Reproduction in the Barbary ground squirrels was seasonal; in 2014, mating started at the  
247 end of January and ended mid-March, whereas in 2015 and 2016 mating started at the beginning  
248 of January and late December and ended mid-February and at the end of January, respectively.  
249 Males were scrotal for  $76.3 \pm 4.0$  days ( $n = 65$ ) after the last day of the mating period, but it took  
250 on average  $152.1 \pm 5.0$  days ( $n = 54$ ) for males to fully regress their scrota. All adult females that  
251 we sampled within a group bred. Gestation length was  $43.5 \pm 0.4$  days (range 39-49 days;  $n = 47$   
252 females) and lactation lasted  $42.3 \pm 0.5$  days (range 39-46 days;  $n = 43$  females). Female age at

253 first birth was the first breeding season except for the six subadults in 2014. The estimates of age  
254 at first birth calculated for females with known date of birth ( $343.4 \pm 11.0$  days,  $n = 8$ ) and for  
255 females with known date of emergence ( $345.5 \pm 5.7$  days,  $n = 15$ ) did not differ (Mann-Whitney  
256  $U$  test:  $U = 53$ ,  $P = 0.67$ ). Therefore, average age of first birth was  $344.8 \pm 5.2$  days ( $n = 23$   
257 females).

258 Over a two-year period (2015 and 2016), 15 of 138 pregnancies failed (10.9%). Females  
259 rebred in 11 of these failed pregnancies (73.3%), although five of these later pregnancies failed  
260 again (45.5%). Maternal success rate (proportion of females that successfully raised their litter to  
261 emergence) did not differ among years (2014: 0.78, 2015: 0.76, and 2016: 0.79; chi-square test  
262 of independence:  $\chi^2_2 = 0.71$ ,  $P = 0.70$ ). In 2016, eight females of a total of 80 (10.0%) were  
263 observed to have a second litter in one breeding season after they had successfully bred once, but  
264 we do not have data on their litters because we left the field before the emergence of these late  
265 litters. In 2014, 112 juveniles emerged from 28 litters; in 2015, 161 juveniles from 44 litters; and  
266 in 2016, 166 juveniles from 63 litters. Average litter size did not differ among years (2014:  $2.3 \pm$   
267  $0.3$ , 2015:  $3.4 \pm 0.4$ , and 2016:  $3.1 \pm 0.2$ ; Kruskal-Wallis test:  $H_2 = 3.91$ ,  $P = 0.14$ ). The mean  
268 percentage of adult females that were successful in raising one litter during the three-year period  
269 was  $75.5 \pm 2.0\%$ , with a litter size of  $3.0 \pm 0.2$  [1 – 8] juveniles/litter ( $n = 62$  litters). Litter sex  
270 ratio was 0.50 male across all years and did not differ among years (2014: 0.50, 2015: 0.47, and  
271 2016: 0.52; chi-square test of independence:  $\chi^2_2 = 0.24$ ,  $P = 0.89$ ), nor did it differ from parity  
272 (exact binomial test: two-tailed  $P = 1.0$ , 95%-CI = [0.42 - 0.59],  $n = 45$  litters from 40 distinct  
273 females). Juvenile mortality was significantly lower in 2014 (19.4%) compared to 2015 (50.3%)  
274 and 2016 (49.4%), respectively ( $\chi^2_2 = 31.24$ ,  $P < 0.001$ ).

275 Average adult body mass outside of the reproductive season was  $221.1 \pm 5.7$  g ( $n = 116$   
276 individuals) with males weighing  $227.0 \pm 6.4$  g ( $n = 51$ ), and females weighing  $204.0 \pm 5.0$  g  
277 ( $n = 65$ ). As average lifespan did not differ between adult males and females (lifespan of  
278 individuals of known age, Mann-Whitney  $U$  test:  $U = 247.5$ ,  $P = 0.20$ ; and lifespan of  
279 individuals of uncertain age included,  $U = 10187$ ,  $P = 0.95$ ), we combined the sexes. The  
280 estimated average lifespan of the Barbary ground squirrel in our sites calculated over a three-year  
281 span was  $1.48 \pm 0.09$  years of age for the individuals with known age ( $n = 52$ ), but  $1.76 \pm 0.06$   
282 years when individuals with uncertain age were included ( $n = 239$ ). The survival rate did not  
283 differ between males and females ( $P = 0.41$ ) and was  $0.89 \pm 0.02$ ,  $0.79 \pm 0.03$ , and  $0.73 \pm 0.04$  at  
284 age 1, 2, and 3 years, respectively. Reproductive lifespan calculated using the maximum  
285 lifespan/longevity of five years (Aulagnier et al., 2013) was 1480.2 days (4.1 years).

286 Although, the reproductive lifespan is shorter and body mass is lower than other invasive  
287 species, Barbary ground squirrels have large and frequent litters similar to other invasive species  
288 (Table 1, Fig. 1).

289

#### 290 *Life history vs introduction effort in explaining invasion success of squirrels*

291 The model without added variability of the independent variables within species  
292 (looic = 71.7) best explained whether squirrels were successful invaders in comparison to the  
293 model with added variability of the independent variables within species (looic = 82.6).  
294 However, neither number of founders, nor life history characteristics explained invasion status of  
295 introduced squirrels (Fig. 2), as all the posterior distributions of the covariates crossed zero  
296 (Fig. 3). We found effects that were both dependent and independent of the phylogenetic

297 relationship between species (random effect species: 95% CI = [0.01 – 1.99] and phylogenetic  
298 signal: 95% CI = [0.04 – 4.13]).

299

## 300 Discussion

301 Our study provides the first detailed data on the life history and population dynamics of  
302 an invasive population of Barbary ground squirrels, a species with one of the lowest introduction  
303 efforts (one pair or three individuals as founders, Katzer et al. 2020) but great invasion success  
304 compared to other introduced mammals (Capellini et al. 2015). The Barbary ground squirrel  
305 represents the fast end of the “fast-slow continuum” of life history traits, because they are  
306 small-bodied, mature within their first year and females have large and frequent litters (Table 1).  
307 Barbary ground squirrels’ exceptional invasion success (despite low introduction effort, Katzer  
308 et al. 2020) is not due to a remarkable fast life history profile as their life history is comparable to  
309 other invasive species that do not have such a low introduction effort (Table 1, Fig 1). When we  
310 analysed the effects of introduction effort and life history traits further, we found that neither  
311 number of founders nor life history traits influenced invasion status of introduced squirrel  
312 species. These results suggest that especially for squirrels, other traits besides introduction effort  
313 and life history traits influence their probability to successfully invade a new range, which we  
314 discuss further below.

315

### 316 *Potential factors influencing invasion success of Barbary ground squirrels*

317 The Barbary ground squirrel can be considered a genetic paradox of invasion (Estoup et  
318 al. 2016). The successfully invaded population was founded by 2 or 3 individuals resulting in  
319 low genetic diversity and high level of inbreeding (Kratzer et al. 2020). A high degree of

320 inbreeding could lead to inbreeding depression, i.e., a high impact of deleterious alleles on the  
321 average fitness of offspring (Ralls et al. 1979; Ralls and Ballou 1982). But, the particular case of  
322 the Barbary ground squirrel, with a population estimated at around one million individuals  
323 (López-Darias 2007), argues against inbreeding depression, because this population has  
324 successfully reproduced and grown. Although the squirrels have a fast life history, this factor  
325 alone could not explain their invasion success (this study). Besides a fast life history, other  
326 aspects, such as anthropogenic, habitat or species-level factors, may have favoured the invasion  
327 success. First, multiple anthropogenic translocations of the initial founder population (Machado  
328 1979; Machado and Domínguez 1982; López-Darias, unpubl. data) may have had a significant  
329 effect on the invasion success of the Barbary ground squirrel.

330         Second, climatically matched habitat characteristics could impact the adaptive potential  
331 and population growth of an introduced species in their new range (Lodge 1993; Kolar and  
332 Lodge 2001; Forsyth et al. 2004; Hayes and Barry 2008). For Barbary ground squirrels, climate  
333 conditions of the source location (Sidi Ifni, Morocco, Machado 1979; 133 mm rainfall/year and  
334 19.2 °C, Merkel, n.d.) are very similar to the habitat on Fuerteventura (Machado 1979; <100 mm  
335 rainfall/year and ~ 20 °C, López-Darias and Lobo 2008). Since the climate is so similar, it is no  
336 surprise that climate did not affect the squirrel's abundance in their invasive range (López-Darias  
337 and Lobo 2008). As well, habitat preferences are similar between the native (Rihane et al. 2019)  
338 and the invasive range (López-Darias and Lobo 2008). Moreover, Barbary ground squirrels are  
339 reported to have a low diversity of parasites in their new range (López-Darias et al. 2008), and  
340 number of predator species (species richness) is lower in the invasive range (Gangoso et al.  
341 2006; Medina et al. 2008) compared to the endemic range (Machado 1979). Additionally, the  
342 main current aerial predator (the Eurasian buzzard) had an atypically small population at the time



343 the squirrels were introduced (Gangoso et al. 2006), suggesting a release from predation around  
344 the establishment stage of the Barbary ground squirrel. Only 2% of the diet of the only terrestrial  
345 predator of the Barbary ground squirrel, feral cats, consists of the squirrels (Medina et al. 2008).  
346 Nevertheless, predation pressure may still be significant if the number of feral cats is large. No  
347 information regarding the population size of feral cats is available, but cats were introduced to  
348 the Canarian archipelago in the 15<sup>th</sup> century and are now present in each habitat of each main  
349 island (Medina et al. 2008). Overall, Fuerteventura can be considered a suitable habitat for the  
350 Barbary ground squirrel.

351        Barbary ground squirrels also may have become successful invaders due to behavioural  
352 advantages, as favourable behavioural traits promote success at each stage of the invasion  
353 (Holway and Suarez 1999; Chapple et al. 2012; Carere and Gherardi 2013). Species with  
354 increased interspecific or decreased intraspecific aggression, and behaviours enhancing their  
355 dispersal, e.g., exploration, activity, and boldness, should perform better in their new habitat  
356 (Holway and Suarez 1999). These behavioural traits have been hypothesised to represent an  
357 invasion syndrome (Sih et al. 2004; Chapple et al. 2012), and can be linked to life history traits,  
358 which then result in “pace-of-life” syndromes (Réale et al. 2010). Often species with a fast pace-  
359 of-life syndrome, i.e., more explorative and bold species, have lower survival chances because  
360 they are more exposed to predators and parasites (Réale et al. 2010). For introduced species, a  
361 fast pace-of-life may be advantageous since there are fewer predators and parasites resulting in  
362 higher survival chances. In Barbary ground squirrels, this hypothesis is supported, because more  
363 explorative individuals were better at avoiding predation, resulting in greater survival chances  
364 (Piquet et al. 2018).

365 Finally, generalist species –species not specialised in habitat use or diet– are suggested to  
366 better adapt to a variable environment and to have a better chance of becoming successful than  
367 specialist species (Fisher and Owens 2004). The Barbary ground squirrel has a generalist diet  
368 because they are omnivorous and eat not only seeds, nuts, and fruits, but also native mollusks  
369 (Machado and Domínguez 1982; López-Darias and Nogales 2008). Also, we have recorded them  
370 feeding on the horns and hooves of goat carcasses (van der Marel, pers. obs.), supporting the  
371 suggestion that the squirrels could be mineral-limited (Machado 1979). A generalist diet could  
372 have helped the squirrels survive dry years with scarce resources, as they would have a wider  
373 niche breadth and not depend on a limiting resource. For example, in Darwin’s tree finches,  
374 generalist species have a more varied diet in dry years compared to wet years (Christensen and  
375 Kleindorfer 2009). Thus, multiple different aspects could have helped the squirrels overcome  
376 barriers in their introduced range.

377

### 378 *Life history vs introduction effort in explaining invasion success of squirrels*

379 Neither introduction effort measured as the number of founders nor life history traits  
380 affected invasion status of squirrels as all the posterior distributions of the covariates crossed  
381 zero (Figure 3). The life history traits may not be varied enough among the related squirrel  
382 species studied here to show any effects on invasion status, as we do see an effect of phylogeny  
383 in our model. It seems counterintuitive that introduction effort does not impact invasion success,  
384 because multiple advantages are associated with a high introduction effort (Lockwood et al.  
385 2005; Colautti et al. 2006; Simberloff 2009; Blackburn et al. 2015). First, multiple introduction  
386 events increase fitness (Keller and Taylor 2010) and eventually genetic diversity (Dlugosch and  
387 Parker 2008). Genetic diversity loss is U-shaped when plotted against time since first

388 introduction, suggesting that an invasive population regains its genetic diversity over time, which  
389 can be promoted when multiple introduced populations connect (Dlugosch and Parker 2008).  
390 Second, more founders reduce the risk of extinction and promote adaptability to the new  
391 environment through increased genetic diversity (Dlugosch and Parker 2008; Blackburn et al.  
392 2015). For example, lower genetic diversity caused by a small number of founders reduced the  
393 spread rate of grey squirrels (Signorile et al. 2014). Still, the species did successfully spread  
394 despite a low introduction effort, albeit slower, suggesting that a loss in genetic diversity does  
395 not imply a loss in the adaptive potential of an introduced species per se (Dlugosch and Parker  
396 2008). Instead, the probability for population growth from a small founding population in tree  
397 squirrels may be attributed to high reproductive output (Wood et al. 2007). Additionally, climate  
398 suitability may be a better predictor for invasion success than the number of founders or a fast  
399 life history in squirrels, similar to mammals introduced to Australia (Forsyth et al. 2004).  
400 Normally, demographic stochasticity negatively affects population growth in small populations;  
401 However, other factors unrelated to demographic stochasticity, such as unsuitable habitat or  
402 climate, may negatively impact large populations as well (Blackburn et al. 2015). As such, small  
403 populations may then persist when other factors, such as climate and habitat suitability, work  
404 instead in their favour.

405

#### 406 *Concluding remarks and future studies*

407         Barbary ground squirrels have a fast life history strategy resulting in rapid population  
408 growth. If these life history traits have not changed since 1965, their fast life history may have  
409 contributed to their invasion success with an extremely low introduction effort on Fuerteventura  
410 Island, together with favourable behavioural traits, a generalist diet and good resources, enemy

411 release, and similar habitats and climate. Only by understanding their basic biology will we be in  
412 the position to control and minimise the ecological damage this species causes in their new  
413 habitat. For a future study, we could run a population model to predict how long it would take for  
414 a pair of squirrels to spread across the island or to evaluate the necessary effort to control the  
415 population or reduce the number of squirrels on Fuerteventura, while taking the factors  
416 influencing their invasion success into account (Merrick and Koprowski 2017).

417 Our study also aids in constructing a comprehensive framework on the factors, including  
418 life history traits and introduction effort, influencing invasion success in mammals. For  
419 introduced squirrels, suitable climate or habitat may be more important predictors whether a  
420 species becomes a successful invader than introduction effort or life history traits alone. Our  
421 results contradict the concept that introduction effort is the key factor influencing invasion  
422 success (Lockwood et al. 2005; Simberloff 2009); instead, we argue that the invasion success can  
423 be influenced by multiple aspects of the new habitat or the biology of the introduced species.

424

#### 425 Acknowledgements

426 We thank the owners of our study sites for access to their lands, the Cabildo of  
427 Fuerteventura for access at the Estación Biológica de la Oliva, and the IPNA-CSIC for logistical  
428 support. We thank Dr. Anjos for providing useful feedback.

429

#### 430 Declarations

431 Funding: This study was funded by a University of Manitoba Faculty of Science graduate  
432 studentship and a Faculty of Graduate Studies Graduate Enhancement of the Tri-Council Stipend  
433 (GETS) to AM, by Cabildo de Tenerife, Program TF INNOVA 2016-21 (with MEDI & FDCAN

434 Funds) (P. INNOVA 2016-2021) to MLD, and the Natural Sciences and Engineering Research  
435 Council of Canada (#04362), the Canadian Foundation for Innovation, and the University of  
436 Manitoba University Research Grant Program to JMW.

437 Conflict of interest: The authors declare that they have no conflict of interest

438 Ethics approval: All procedures conformed to the guidelines of the American Society of  
439 Mammalogists for the use of wild mammals in research, were approved by the University of  
440 Manitoba Animal Care and Use Committee (protocol #F14-032), and were permitted by the  
441 government of Fuerteventura (Cabildo Insular de Fuerteventura #14885).

442 Consent to participate: Not applicable

443 Consent for publication: All authors whose names appear on the submission approved the  
444 version to be published.

445 Availability of data and material: The datasets analysed during the current study are available in  
446 the Github repository, [https://github.com/annemarievdmarel/lifehistory\\_invasion](https://github.com/annemarievdmarel/lifehistory_invasion) (DOI:  
447 10.5281/zenodo.4136880).

448 Code availability: The code used during the current study are available in the Github repository,  
449 [https://github.com/annemarievdmarel/lifehistory\\_invasion](https://github.com/annemarievdmarel/lifehistory_invasion) (DOI: 10.5281/zenodo.4136880).

450 Author Contributions: AM, JMW and MLD conceived and designed the study and collected the  
451 data. AM analyzed the data and first drafted the manuscript; the contributions of AM, JMW and  
452 MLD made up the final manuscript.

453

454 Literature cited

455 Allen WL, Street SE, Capellini I (2017) Fast life history traits promote invasion success in  
456 amphibians and reptiles. *Ecol Lett* 20:222–230. <https://doi.org/10.1111/ele.12728>

- 457 Allendorf FW, Lundquist LL (2003) Introduction: population biology, evolution, and control of  
458 invasive species. *Conserv Biol* 17:24–30
- 459 Aulagnier S, Gouat P, Thévenot M (2013) *Atlantoxerus getulus* BARBARY GROUND  
460 SQUIRREL. In: Happold DCD (ed) *Mammals of Africa: Volume III*. Bloomsbury  
461 Publishing, London, pp 43–44
- 462 Bañares A, Blanca G, Güemes J, et al (2003) *Atlas y Libro Rojo de la Flora Vasculare Amenazada*  
463 *de España*. Dirección General de Conservación de la Naturaleza. Madrid
- 464 Benitez V V., Almada Chavez S, Gozzi AC, et al (2013) Invasion status of Asiatic red-bellied  
465 squirrels in Argentina. *Mamm Biol - Zeitschrift für Säugetierkd* 78:164–170.  
466 <https://doi.org/10.1016/j.mambio.2012.10.002>
- 467 Bertolino S (2009) Animal trade and non-indigenous species introduction: the world-wide spread  
468 of squirrels. *Divers Distrib* 15:701–708. <https://doi.org/10.1111/j.1472-4642.2009.00574.x>
- 469 Bertolino S, Lurz PWW (2013) *Callosciurus* squirrels: worldwide introductions, ecological  
470 impacts and recommendations to prevent the establishment of new invasive populations.  
471 *Mamm Rev* 43:22–33. <https://doi.org/10.1111/j.1365-2907.2011.00204.x>
- 472 Bielby J, Mace GM, Bininda-Emonds ORP, et al (2007) The fast–slow continuum in  
473 mammalian life history: An empirical reevaluation. *Am Nat* 169:748–757.  
474 <https://doi.org/10.1086/516847>
- 475 Blackburn TM, Lockwood JL, Cassey P (2015) The influence of numbers on invasion success.  
476 *Mol Ecol* 24:1942–1953. <https://doi.org/10.1111/mec.13075>
- 477 Blackburn TM, Pyšek P, Bacher S, et al (2011) A proposed unified framework for biological  
478 invasions. *Trends Ecol Evol* 26:333–339. <https://doi.org/10.1016/j.tree.2011.03.023>
- 479 Bürkner PC (2017) brms: An R package for Bayesian multilevel models using Stan. *J Stat Softw*

- 480 80: <https://doi.org/10.18637/jss.v080.i01>
- 481 Bürkner PC (2018) Advanced Bayesian multilevel modeling with the R package brms. R J  
482 10:395–411. <https://doi.org/10.32614/rj-2018-017>
- 483 Capellini I, Baker J, Allen WL, et al (2015) The role of life history traits in mammalian invasion  
484 success. Ecol Lett 18:1099–1107. <https://doi.org/10.1111/ele.12493>
- 485 Carere C, Gherardi F (2013) Animal personalities matter for biological invasions. Trends Ecol  
486 Evol 28:5–6. <https://doi.org/10.1016/j.tree.2012.10.006>
- 487 Chapple DG, Simmonds SM, Wong BBM (2012) Can behavioral and personality traits influence  
488 the success of unintentional species introductions? Trends Ecol Evol 27:57–62.  
489 <https://doi.org/10.1016/j.tree.2011.09.010>
- 490 Charnov EL (1982) The theory of sex allocation. Princeton University Press, Princeton (NJ)
- 491 Christensen R, Kleindorfer S (2009) Jack-of-all-trades or master of one? Variation in foraging  
492 specialisation across years in Darwin’s Tree Finches (*Camarhynchus* spp.). J Ornithol  
493 150:383–391. <https://doi.org/10.1007/s10336-008-0358-y>
- 494 Colautti RI, Grigorovich IA, MacIsaac HJ (2006) Propagule pressure: A null model for  
495 biological invasions. Biol Invasions 8:1023–1037. <https://doi.org/10.1007/s10530-005-3735-y>
- 496 3735-y
- 497 Colautti RI, Ricciardi A, Grigorovich IA, MacIsaac HJ (2004) Is invasion success explained by  
498 the enemy release hypothesis? Ecol Lett 7:721–733. <https://doi.org/10.1111/j.1461-0248.2004.00616.x>
- 499 0248.2004.00616.x
- 500 Culina A, Linton DM, Pradel R, et al (2019) Live fast, don’t die young: Survival-reproduction  
501 trade-offs in long-lived income breeders. J Anim Ecol 1–11. <https://doi.org/10.1111/1365-2656.12957>
- 502 2656.12957

- 503 Dlugosch KM, Parker IM (2008) Founding events in species invasions: genetic variation,  
504 adaptive evolution, and the role of multiple introductions. *Mol Ecol* 17:431–49.  
505 <https://doi.org/10.1111/j.1365-294X.2007.03538.x>
- 506 Dobson FS, Oli MK (2007a) Fast and slow life histories of mammals. *Ecoscience* 14:292–299.  
507 <https://doi.org/10.1139/z11-033>
- 508 Dobson FS, Oli MK (2007b) Fast and slow life histories of rodents. In: Wolff JO, Sherman PW  
509 (eds) *Rodent Societies. An Ecological and Evolutionary Perspective*. The University of  
510 Chicago Press, Chicago and London, pp 99–105
- 511 Estoup A, Ravigné V, Hufbauer R, et al (2016) Is there a genetic paradox of biological invasion?  
512 *Annu Rev Ecol Evol Syst* 47:51–72. [https://doi.org/10.1146/annurev-ecolsys-121415-](https://doi.org/10.1146/annurev-ecolsys-121415-032116)  
513 [032116](https://doi.org/10.1146/annurev-ecolsys-121415-032116)
- 514 Fisher DO, Owens IPF (2004) The comparative method in conservation biology. *Trends Ecol*  
515 *Evol* 19:391–8. <https://doi.org/10.1016/j.tree.2004.05.004>
- 516 Forsyth DM, Duncan RP, Bomford M, Moore G (2004) Climatic suitability, life-history traits,  
517 introduction effort, and the establishment and spread of introduced mammals in Australia.  
518 *Conserv Biol* 18:557–569
- 519 Fox J, Weisberg S (2011) *An {R} companion to applied regression*, second edition.
- 520 Gangoso L, Donázar JA, Scholz S, et al (2006) Contradiction in conservation of island  
521 ecosystems: plants, introduced herbivores and avian scavengers in the Canary Islands.  
522 *Biodivers Conserv* 15:2231–2248. <https://doi.org/10.1007/s10531-004-7181-4>
- 523 Groh K, García A (2004) Phylum Mollusca. In: Izquierdo I, Martín JL, Zurita N, Arechavaleta M  
524 (eds) *Lista de especies silvestres de Canarias (hongos, plantas y animales terrestres)*. pp  
525 149–154



- 526 Hayes KR, Barry SC (2008) Are there any consistent predictors of invasion success? Biol  
527 Invasions 10:483–506. <https://doi.org/10.1007/s10530-007-9146-5>
- 528 Holway DA, Suarez A V (1999) Animal behavior: an essential component of invasion biology.  
529 Trends Ecol Evol 14:328–330. [https://doi.org/10.1016/S0169-5347\(99\)01636-5](https://doi.org/10.1016/S0169-5347(99)01636-5)
- 530 Hutterer R (2008) *Crocidura canariensis*. In: IUCN Red List Threat. Species.  
531 [www.iucnredlist.org](http://www.iucnredlist.org). Accessed 20 Feb 2015
- 532 Keller SR, Taylor DR (2010) Genomic admixture increases fitness during a biological invasion. J  
533 Evol Biol 23:1720–1731. <https://doi.org/10.1111/j.1420-9101.2010.02037.x>
- 534 Kolar CS, Lodge DM (2001) Progress in invasion biology: predicting invaders. Trends Ecol Evol  
535 16:199–204
- 536 Koprowski JL (2002) Handling tree squirrels with a safe and efficient restraint. Wildl Soc Bull  
537 30:101–103
- 538 Kratzer K V, van der Marel A, Garroway C, et al (2020) Evidence for an extreme founding effect  
539 in a highly successful invasive species. bioRxiv 2020.08.04:  
540 <https://doi.org/10.1101/2020.08.04.236695>
- 541 Lawton C, Cowan P, Bertolino S, et al (2010) The consequences of introducing non-indigenous  
542 species: two case studies, the grey squirrel in Europe and the brushtail possum in New  
543 Zealand. Rev Sci Tech (International Off Epizoot 29:287–298.  
544 <https://doi.org/https://dx.doi.org/10.1097/JTO.0b013e31828b5228>
- 545 Le Roux JJ, Wieczorek AM, Meyer JY (2008) Genetic diversity and structure of the invasive tree  
546 *Miconia calvescens* in Pacific islands. Divers Distrib 14:935–948.  
547 <https://doi.org/10.1111/j.1472-4642.2008.00504.x>
- 548 Liu C, Comte L, Olden JD (2017) Heads you win, tails you lose: Life-history traits predict

549 invasion and extinction risk of the world's freshwater fishes. *Aquat Conserv Mar Freshw*  
550 *Ecosyst* 27:773–779. <https://doi.org/10.1002/aqc.2740>

551 Lockwood JL, Cassey P, Blackburn T (2005) The role of propagule pressure in explaining  
552 species invasions. *Trends Ecol Evol* 20:223–228. <https://doi.org/10.1016/j.tree.2005.02.004>

553 Lodge D (1993) Biological invasions: lessons for ecology. *Trends Ecol Evol* 8:133–136

554 López-Darias M (2007) Ecology of invasions: the case of the Barbary ground squirrel  
555 (*Atlantoxerus getulus*) in Fuerteventura Island (Canary Islands). PhD thesis, University of  
556 La Laguna. San Cristóbal de La Laguna, Spain

557 López-Darias M (2008) *Atlantoxerus getulus* Linnaeus, 1758 *Ardilla moruna* Barbary ground  
558 squirrel. 3:

559 López-Darias M, Lobo JM (2008) Factors affecting invasive species abundance: the Barbary  
560 Ground Squirrel on Fuerteventura Island, Spain. *Zool Stud* 47:268–281

561 López-Darias M, Nogales M (2008) Effects of the invasive Barbary ground squirrel  
562 (*Atlantoxerus getulus*) on seed dispersal systems of insular xeric environments. *J Arid*  
563 *Environ* 72:926–939. <https://doi.org/10.1016/j.jaridenv.2007.12.006>

564 López-Darias M, Nogales M (2016) Raptors as legitimate secondary dispersers of weed seeds.  
565 *Ibis (Lond 1859)* 158:428–432. <https://doi.org/10.1111/ibi.12360>

566 López-Darias M, Ribas A, Feliú C (2008) Helminth parasites in native and invasive mammal  
567 populations: comparative study on the Barbary ground squirrel *Atlantoxerus getulus* L.  
568 (Rodentia, Sciuridae) in Morocco and the Canary Islands. *Acta Parasitol* 53:296–301.  
569 <https://doi.org/10.2478/s11686-008-0036-5>

570 Lorenzo-Morales J, López-Darias M, Martínez-Carretero E, Valladares B (2007) Isolation of  
571 potentially pathogenic strains of *Acanthamoeba* in wild squirrels from the Canary Islands

- 572 and Morocco. *Exp Parasitol* 117:74–79. <https://doi.org/10.1016/j.exppara.2007.03.014>
- 573 Machado A (1979) The introduction of the Getulian squirrel (*Atlantoxerus getulus* L., 1758) in  
574 Fuerteventura, Canary Islands. *Egypt J Wildl Nat Resour* 2:182–202
- 575 Machado A, Domínguez F (1982) Estudio sobre la presencia de la Ardilla Moruna (*Atlantoxerus*  
576 *getulus* L.) en la isla de Fuerteventura; su introducción, su biología y su impacto en el  
577 medio. Santa Cruz de Tenerife, Spain
- 578 Medina FM, López-Darias M, Nogales M, García R (2008) Food habits of feral cats (*Felis*  
579 *silvestris catus* L.) in insular semiarid environments (Fuerteventura, Canary Islands). *Wildl*  
580 *Res* 35:162–169. <https://doi.org/10.1071/WR07108>
- 581 Merkel A Climate Data. <https://en.climate-data.org/>. Accessed 29 Jan 2019
- 582 Merrick MJ, Koprowski JL (2017) Should we consider individual behavior differences in applied  
583 wildlife conservation studies? *Biol Conserv* 209:34–44.  
584 <https://doi.org/10.1016/j.biocon.2017.01.021>
- 585 Pettitt BA, Waterman JM, Wheaton CJ (2008) Assessing the effects of resource availability and  
586 parity on reproduction in female Cape ground squirrels: resources do not matter. *J Zool*  
587 276:291–298. <https://doi.org/10.1111/j.1469-7998.2008.00491.x>
- 588 Piquet JC, López-Darias M, van der Marel A, et al (2018) Unraveling behavioral and pace-of-life  
589 syndromes in a reduced parasite and predation pressure context: personality and survival of  
590 the Barbary ground squirrel. *Behav Ecol Sociobiol* 72:147. [https://doi.org/10.1007/s00265-](https://doi.org/10.1007/s00265-018-2549-8)  
591 [018-2549-8](https://doi.org/10.1007/s00265-018-2549-8)
- 592 Promislow DEL, Harvey PH (1990) Living fast and dying young: A comparative analysis of life-  
593 history variation among mammals. *J Zool Soc London* 220:417–437
- 594 R Core Team (2017) R: A language and environment for statistical computing.

- 595 R Core Team (2020) R: A language and environment for statistical computing. R Found. Stat.  
596 Comput.
- 597 Ralls K, Ballou J (1982) Effect of inbreeding on juvenile mortality in some small mammal  
598 species. Lab Anim 16:159–166. <https://doi.org/10.1258/002367782781110151>
- 599 Ralls K, Brugger K, Ballou J (1979) Inbreeding and juvenile mortality in small populations of  
600 ungulates. Science (80- ) 206:1101–1103
- 601 Réale D, Garant D, Humphries MM, et al (2010) Personality and the emergence of the pace-of-  
602 life syndrome concept at the population level. Philos Trans R Soc Lond B Biol Sci  
603 365:4051–63. <https://doi.org/10.1098/rstb.2010.0208>
- 604 Rihane A, El Hamoumi R, El Agbani MA, et al (2019) Expansion of the North African ground  
605 squirrel *Atlantoxerus getulus* (Rodentia) along the Moroccan Mid-Atlantic Plains.  
606 Mammalia 83:150–156. <https://doi.org/10.1515/mammalia-2017-0150>
- 607 Rolland J, Condamine FL, Jiguet F, Morlon H (2014) Faster Speciation and Reduced Extinction  
608 in the Tropics Contribute to the Mammalian Latitudinal Diversity Gradient. PLoS Biol 12:.  
609 <https://doi.org/10.1371/journal.pbio.1001775>
- 610 Ryan CP, Anderson WG, Gardiner LE, Hare JF (2012) Stress-induced sex ratios in ground  
611 squirrels: Support for a mechanistic hypothesis. Behav Ecol 23:160–167.  
612 <https://doi.org/10.1093/beheco/arr169>
- 613 Sæther B, Engen S, Pape Møller A, et al (2004) Life history variation predicts the effects of  
614 demographic stochasticity on avian population dynamics. Am Nat 164:793–802.  
615 <https://doi.org/10.1086/425371>
- 616 Signorile AL, Wang J, Lurz PWW, et al (2014) Do founder size, genetic diversity and structure  
617 influence rates of expansion of North American grey squirrels in Europe? Divers Distrib

- 618 20:918–930. <https://doi.org/10.1111/ddi.12222>
- 619 Sih A, Bell AM, Johnson JC, Ziemba RE (2004) Behavioral syndromes: an integrative overview.  
620 Q Rev Biol 79:241–277
- 621 Simberloff D (2009) The role of propagule pressure in biological invasions. *Annu Rev Ecol Evol*  
622 Syst 40:81–102. <https://doi.org/10.1146/annurev.ecolsys.110308.120304>
- 623 Sol D, Bacher S, Reader SM, Lefebvre L (2008) Brain size predicts the success of mammal  
624 species introduced into novel environments. *Am Nat* 172:S63–S71.  
625 <https://doi.org/10.1086/588304>
- 626 Sol D, Maspons J, Vall-llosera M, et al (2012) Unraveling the life history of successful invaders.  
627 *Science* (80- ) 337:580–583. <https://doi.org/10.1126/science.1221523>
- 628 Stearns SC (1983) The influence of size and phylogeny on patterns of covariation among life-  
629 history traits in the mammals. *Oikos* 41:173–187
- 630 Therneau TM (2015) A package for survival analysis in S. [https://cran.r-](https://cran.r-project.org/package=survival)  
631 [project.org/package=survival](https://cran.r-project.org/package=survival). Accessed 13 Nov 2017
- 632 Therneau TM, Grambsch PM (2000) Modeling survival data: Extending the {C}ox model.  
633 *Statistics for Biology and Health*. Springer New York, New York
- 634 Tsutsui ND, Suarez A V, Holway DA, Case TJ (2000) Reduced genetic variation and the success  
635 of an invasive species. *Proc Natl Acad Sci U S A* 97:5948–53.  
636 <https://doi.org/10.1073/pnas.100110397>
- 637 Vahsen ML, Shea K, Hovis CL, et al (2018) Prior adaptation, diversity, and introduction  
638 frequency mediate the positive relationship between propagule pressure and the initial  
639 success of founding populations. *Biol Invasions* 20:2451–2459.  
640 <https://doi.org/10.1007/s10530-018-1713-4>

- 641 van der Marel A, López-Darias M, Waterman JM (2019) Group-enhanced predator detection and  
642 quality of vigilance in a social ground squirrel. *Anim Behav* 151:43-52.  
643 <https://doi.org/10.1016/j.anbehav.2019.02.017>
- 644 van der Marel A, Waterman JM, López-Darias M (2020) Social organization in a North African  
645 ground squirrel. *J Mammal* 101:670-683. <https://doi.org/10.1093/jmammal/gyaa031>
- 646 van Wilgen NJ, Richardson DM (2012) The roles of climate, phylogenetic relatedness,  
647 introduction effort, and reproductive traits in the establishment of non-native reptiles and  
648 amphibians. *Conserv Biol* 26:267–277. <https://doi.org/10.1111/j.1523-1739.2011.01804.x>
- 649 Vehtari A, Gelman A, Gabry J (2017) Practical Bayesian model evaluation using leave-one-out  
650 cross-validation and WAIC. *Stat Comput* 27:1413–1432. [https://doi.org/10.1007/s11222-](https://doi.org/10.1007/s11222-016-9696-4)  
651 [016-9696-4](https://doi.org/10.1007/s11222-016-9696-4)
- 652 Waterman JM (1996) Reproductive biology of a tropical, non-hibernating ground squirrel. *J*  
653 *Mammal* 77:134–146
- 654 Wood DJA, Koprowski JL, Lurz PWW (2007) Tree squirrel introduction: A theoretical approach  
655 with population viability analysis. *J Mammal* 88:1271–1279. [https://doi.org/10.1644/06-](https://doi.org/10.1644/06-MAMM-A-303.1)  
656 [MAMM-A-303.1](https://doi.org/10.1644/06-MAMM-A-303.1)
- 657

658 Figure legends

659 **Fig. 1** Density plots of a) number of introductions and the life history traits, b) longevity, c)  
660 gestation time, d) weaning age, e) litter size, f) litters per year, g) age at first birth, and h)  
661 reproductive lifespan, of mammals and species of the family Sciuridae (squirrels, including  
662 Barbary ground squirrels *Atlantoxerus getulus*) that successfully spread in their introduced range  
663 (invasive species). Dashed lines are the median values for mammals (blue) and squirrels (orange)  
664 and the point values for the traits of Barbary ground squirrels (dashed green line)

665

666 **Fig. 2** The (a) number of founders, (b) weaning age, (c) litters per year, and (d) age at first birth  
667 for squirrel species that did not successfully spread (no) and that did successfully spread (yes)  
668 into their new geographical range. The dark line is the median, the box edges are the upper and  
669 lower quartiles, the whiskers are 50% from the median, and the closed circles are the outliers,  
670 calculated as the values smaller or larger than 1.5 times the box length (i.e., upper - lower  
671 quantile). Note the non-standardized y-values

672

673 **Fig. 3** The posterior distribution of the parameter estimates ( $\beta$ ) of introduction effort and life  
674 history traits. The distributions that cross zero have a negligible effect on invasion status,  
675 whereas distributions that do not contain zero have a strong effect on invasion status

**Table 1** Life history traits median values and sample size (N) for all mammals, the species of the family Sciuridae (squirrels, including Barbary ground squirrels *A. getulus*) that successfully spread in their introduced range (invasive species), and the Barbary ground squirrels only

|                               | Mammals <sup>a</sup> |        | Only squirrels <sup>a</sup> |        | <i>A. getulus</i> only |
|-------------------------------|----------------------|--------|-----------------------------|--------|------------------------|
|                               | <i>N</i>             | median | <i>N</i>                    | median |                        |
| Introduction effort           | 47                   | 26     | 6                           | 11     | 1                      |
| Body mass (g)                 | 47                   | 6361.6 | 5                           | 349.6  | 221.1                  |
| Neonatal body mass (g)        | 47                   | 113.0  | 4                           | 8.8    | 8.9                    |
| Litter size                   | 47                   | 2.3    | 5                           | 3.8    | 2.9                    |
| Litters/year                  | 47                   | 1      | 6                           | 2      | 1                      |
| Age at first birth (days)     | 45                   | 403.3  | 5                           | 357.5  | 344.8                  |
| Gestation time (days)         | 47                   | 66.4   | 5                           | 41.4   | 43.5                   |
| Weaning age (days)            | 45                   | 60.9   | 5                           | 54.8   | 66                     |
| Longevity (years)             | 47                   | 20.0   | 5                           | 15.9   | 5                      |
| Reproductive lifespan (years) | 45                   | 18.3   | 5                           | 15.1   | 4.1                    |

<sup>a</sup> Life history traits adopted from Capellini et al. (2015), except for the *A. getulus* data.



**Fig. 1**

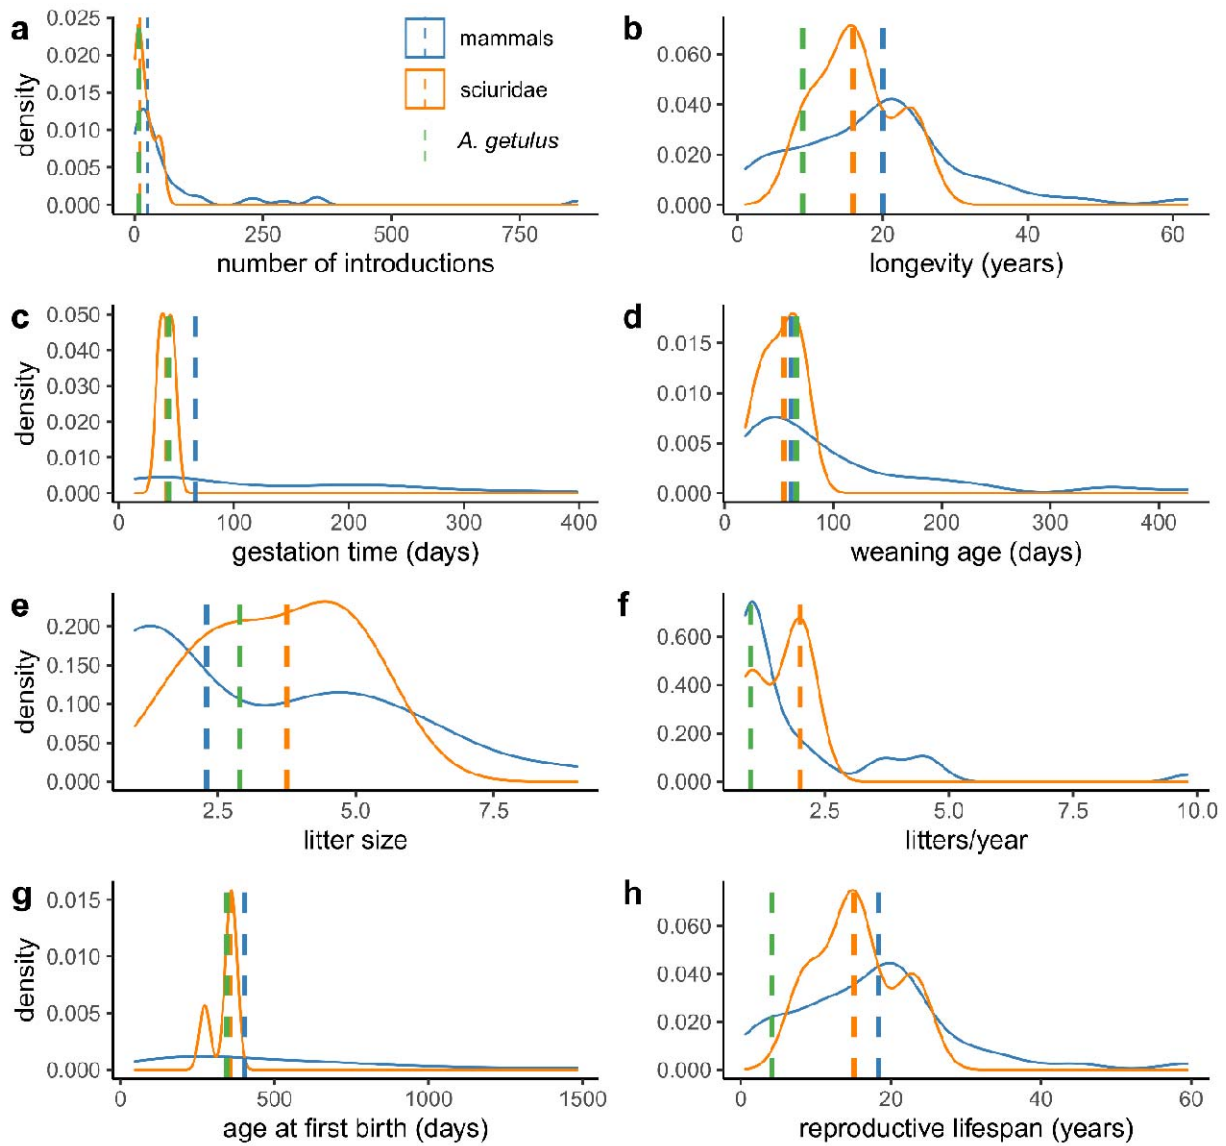

**Fig. 2**

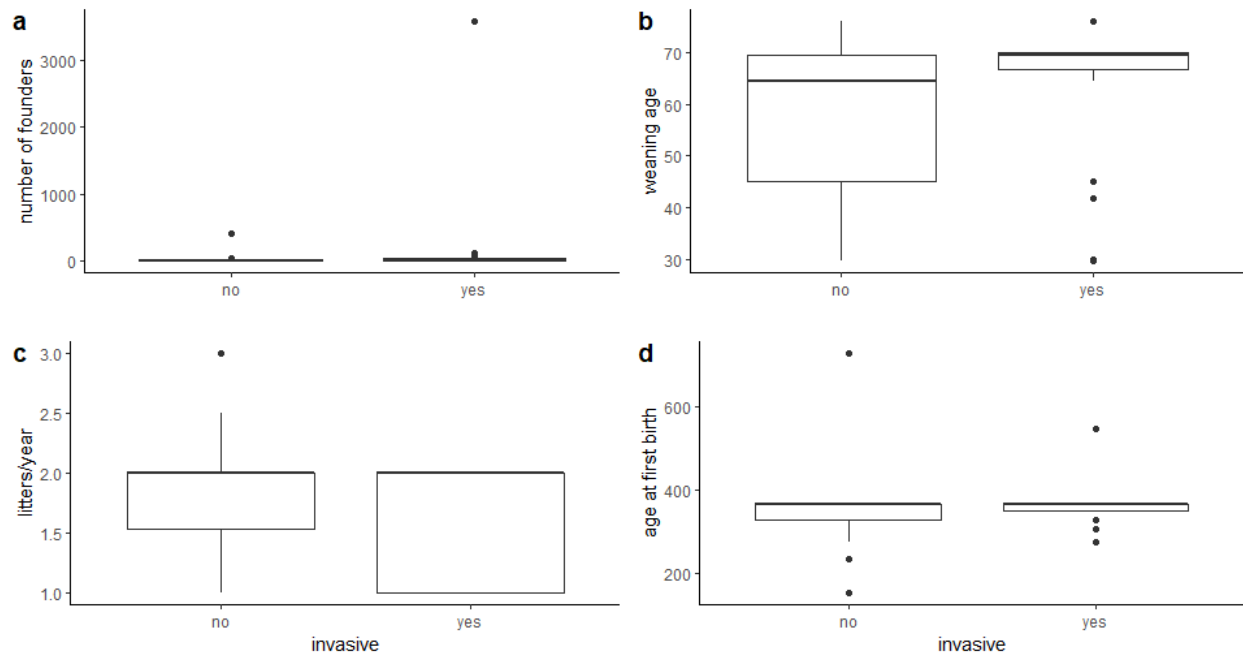

**Fig. 3**

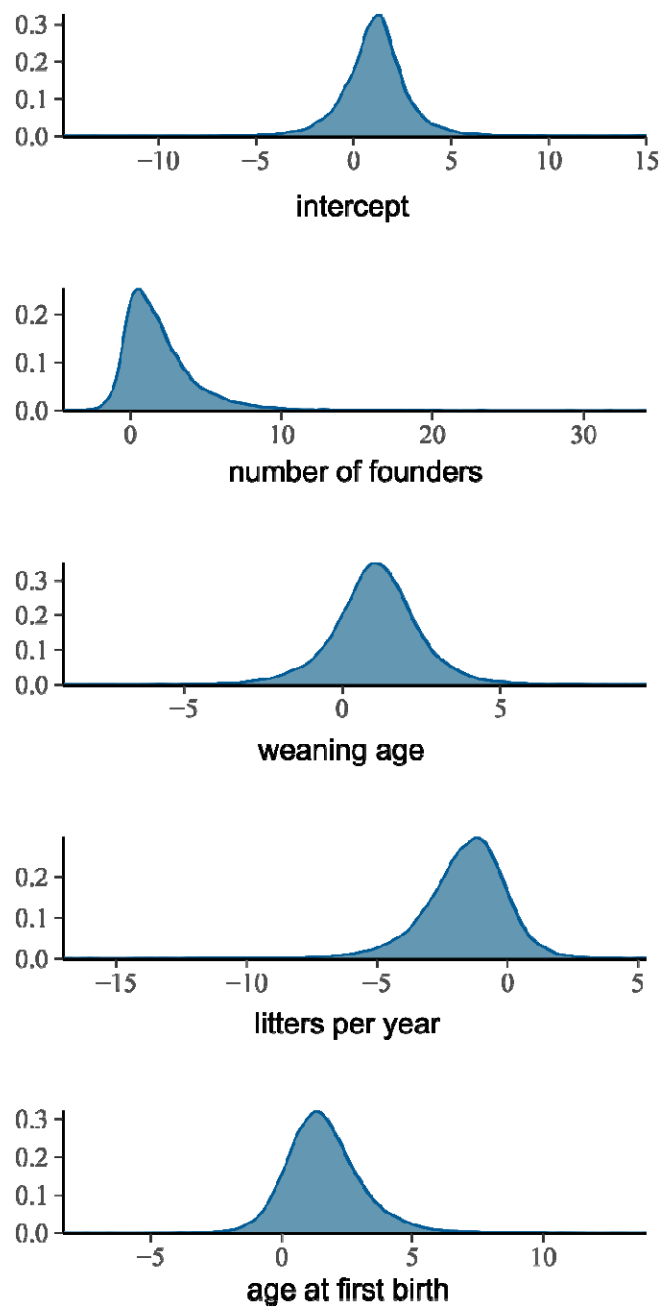

Source: https://www.biorxiv.org/content/10.1101/2020.10.27.357319v1.full.pdf
