# Exploring the role of life history traits and introduction effort in understanding invasion success in mammals: A case study of Barbary ground squirrels

Annemarie van der Marel<sup>a</sup>, Jane M. Waterman<sup>a</sup>, Marta López-Darias<sup>b 1</sup>

<sup>a</sup> *Department of Biological Sciences, University of Manitoba, Winnipeg, Canada*

<sup>b</sup> *Island Ecology and Evolution Research Group, Instituto de Productos Naturales y Agrobiología (IPNA-CSIC), La Laguna, Tenerife, Canary Islands, Spain*

Corresponding author: Annemarie van der Marel, email: [avdmarel@outlook.com](mailto:avdmarel@outlook.com), phone: +1 513 836 4468, *current address*: Department of Biological Sciences, University of Cincinnati, 614 Rieveschl Hall, Cincinnati, OH, USA, 45221-0006

ORCID authors:

van der Marel, A. M.: 0000-0003-3942-8314

Waterman, J. M.: 0000-0003-0027-9067

López-Darias, M.: 0000-0002-7611-1298

---

<sup>1</sup> Author Contributions: AM, JMW and MLD conceived and designed the study and collected the data. AM analyzed the data and first drafted the manuscript; the contributions of AM, JMW and MLD made up the final manuscript.

1 Abstract

2 Invasive species –species that have successfully overcome the barriers of transport, introduction,  
3 establishment, and spread– are a risk to biodiversity and ecosystem function. Introduction effort  
4 is one of the main factors underlying invasion success, but life history traits are also important as  
5 they influence population growth. In this contribution, we first investigated life history traits of  
6 the Barbary ground squirrel, *Atlantoxerus getulus*, a species with a very low introduction effort.  
7 We then studied if their invasion success was due to a very fast life history profile by comparing  
8 their life history traits to those of other successful invasive mammals. Next, we examined  
9 whether the number of founders and/or a fast life history influences the invasion success of  
10 squirrels. Barbary ground squirrels were on the fast end of the “fast-slow continuum”, but their  
11 life history was not the only contributing factor to their invasion success, as the life history  
12 profile is comparable to other invasive species that do not have such a low introduction effort.  
13 We also found that neither life history traits nor the number of founders explained the invasion  
14 success of introduced squirrels in general. These results contradict the concept that introduction  
15 effort is the main factor explaining invasion success, especially in squirrels. Instead, we argue  
16 that invasion success can be influenced by multiple aspects of the new habitat or the biology of  
17 the introduced species.

18 *Keywords:* fast-slow continuum, introduction effort, invasive species, life history, population  
19 dynamics

20

21 Introduction

22 Invasive species are a major threat to biodiversity and ecosystem functions, and are an  
23 economic concern (Simberloff et al. 2013; Doherty et al. 2016; Gallardo et al. 2016; Bellard et

24 al. 2016; IPBES 2019). Introduced species become invasive when they successfully overcome  
25 barriers related to the four different stages of the invasion process (i.e., transport, introduction,  
26 establishment, and spread; Colautti et al. 2004; Blackburn et al. 2011). Factors contributing to  
27 invasion success, including introduction effort (number of founders and/or introduction events),  
28 habitat, and species characteristics, can differentially impact the probability of a species  
29 successfully overcoming each stage (Blackburn et al. 2011). The introduction of many  
30 individuals or founders can lead to a reduction of extinction probability and can enable  
31 populations to more readily adapt to new environments (Blackburn et al. 2015). As well, multiple  
32 introduction events can increase the probability of genomic admixture and can result in increased  
33 fitness (Keller and Taylor 2010; Basso et al. 2019). Furthermore, habitat characteristics influence  
34 invasion success (Lodge 1993; Kolar and Lodge 2001) as they affect the adaptive potential of the  
35 introduced species (Le Roux et al. 2008; Vahsen et al. 2018). Additionally, different species  
36 characteristics could promote expansion success: for example, explorative and dispersive  
37 behaviour may affect the survival of introduced individuals (Holway and Suarez 1999; Chapple  
38 et al. 2012; Carere and Gherardi 2013), and a generalist diet could increase survival as more  
39 resources are available for generalist species in the invasive range (Fisher and Owens 2004). Life  
40 history traits influencing population growth are particularly important at two different stages: 1)  
41 the introduction stage because stochastic events can lead to higher risks of extinction, suggesting  
42 that smaller founding populations with slow population growth may be more susceptible to  
43 extinction (Capellini et al. 2015); and 2) the spread stage because population growth is essential  
44 when dispersing individuals form new populations in their introduced range (Capellini et al.  
45 2015).

46 Life history strategies of species can be placed along a “fast-slow continuum” (Stearns  
47 1983; Promislow and Harvey 1990; Dobson and Oli 2007a, but see Bielby et al. 2007). Fast  
48 species –species with life history traits that accompany rapid population growth, such as early  
49 maturity and frequent and large litters– are generally short-lived with greater fecundity, whereas  
50 species on the slow end of the continuum are long-lived with lower fecundity (Stearns 1983;  
51 Promislow and Harvey 1990; Dobson and Oli 2007b). Nonetheless, species within orders or even  
52 populations within species can show variation along this continuum (Dobson and Oli 2007a,b).  
53 Bat species, for example, may show a combination of life history traits either related to a fast or  
54 slow life history (Culina et al. 2019). In invasion ecology, fast life history traits are suggested to  
55 promote the population growth and spread of introduced species, thus favouring species  
56 ‘invasiveness’: for example, success of mammals at the introduction stage is related to having  
57 large, more frequent litters and a longer reproductive lifespan, while establishment success is  
58 related to larger litters, longer reproductive lifespan and greater introduction effort, and their  
59 spread success is associated with larger, more frequent litters and higher introduction effort  
60 (Capellini et al. 2015). A fast life history influences not only invasion success in mammals  
61 (Capellini et al. 2015, but see Sol et al. 2008), but also in reptiles, amphibians (van Wilgen and  
62 Richardson 2012; Allen et al. 2017), and fishes (Liu et al. 2017). In birds, on the contrary, a slow  
63 life history increases the potential to be a successful invader (Sæther et al. 2004; Sol et al. 2012).  
64 Although, some very successful invasive birds do not have a slow life history (Markula et al.  
65 2016). Thus, for different species, diverse life history traits may influence their potential for  
66 invasion success and exceptions to the general trends occur in all animal taxa.

67 Nevertheless, introduction effort is the major factor amongst those affecting invasion  
68 success (Lockwood et al. 2005; Colautti et al. 2006; Simberloff 2009; Blackburn et al. 2015).

69 Thus, both fast life history traits and a high introduction effort contribute to the probability of  
70 established species to successfully spread in the new range (Capellini et al. 2015; Allen et al.  
71 2017). However, the role of introduction effort in explaining species invasiveness could be  
72 difficult to interpret in certain taxonomic groups, such as squirrels, as some species are known to  
73 be successful invaders without a high introduction effort (either number of founders, introduction  
74 events, or both). For example, in 71.4% of successful invasions of grey squirrels, *Sciurus*  
75 *carolinensis*, the number of founders did not explain invasion success because fewer than ten  
76 individuals were released (Wood et al. 2007; Lawton et al. 2010). Also in the Pallas's squirrel,  
77 *Callosciurus erythraeus*, and the Finlayson's squirrel, *Callosciurus finlaysonii*, the number of  
78 founders did not prevent them from establishing in their introduced ranges, even though fewer  
79 than seven individuals were released (Bertolino 2009; Bertolino and Lurz 2013; Benitez et al.  
80 2013). In the case of the Siberian chipmunk, *Eutamias sibiricus*, some invasive populations were  
81 founded by fewer than 10 (Mori et al. 2018b), although some of those have multiple origins  
82 (Mori et al. 2018a).

83 We used Barbary ground squirrels, *Atlantoxerus getulus*, as an exemplar of a species  
84 whose introduction effort was extremely low, as only 2 or 3 individuals from one source  
85 population in Morocco were introduced to the island of Fuerteventura, Canary Islands, Spain in  
86 1965 (Fig. 1; Machado 1979; Kratzer et al. 2020). In 37 years, the Barbary ground squirrel  
87 spread across the entire island, favoured by five translocation accounts from the original founder  
88 locality to new localities on the island (Machado 1979; Machado and Domínguez 1982; López-  
89 Darias, unpubl. data). Since the introduction, their population has grown to an estimated one  
90 million animals (López-Darias 2007), despite low genetic diversity and a small effective  
91 population size of 77 individuals (Kratzer et al. 2020). The species has negative ecological,

92 economical, and public health impacts. They consume native and endemic snails (Machado and  
93 Domínguez 1982; Groh and García 2004; López-Darias 2007), prey upon some critically  
94 endangered species (Bañares et al. 2003), and feed upon the eggs of small native and endemic  
95 passerine birds (López-Darias 2007). Their ecological impacts go beyond direct predation upon  
96 species, as they alter plant-animal interactions of fleshy-fruited plant species and ruderal weeds,  
97 including herbaceous plants of native or introduced origin (López-Darias and Nogales 2008,  
98 2016). Competition with the endemic shrew, *Crocidura canariensis*, listed as vulnerable by the  
99 IUCN (Hutterer 2008), is suggested (López-Darias 2008; Traveset et al. 2009), but no  
100 quantitative and conclusive data are available. Additionally, these ground squirrels carry  
101 parasites that impact native fauna as well as public health (Lorenzo-Morales et al. 2007; López-  
102 Darias et al. 2008b), and cause damage to agricultural activities (Machado and Domínguez 1982;  
103 López-Darias 2007). Moreover, these ground squirrels alter the population dynamics of predators  
104 in two ways (López-Darias 2007). First, the ground squirrels are the main prey of an endemic  
105 subspecies of Eurasian buzzard, *Buteo buteo insularum*, whose population has increased on  
106 Fuerteventura in the last 40 years, possibly because they prey upon this abundant, new prey  
107 (Gangoso et al. 2006; López-Darias 2007). Second, the ground squirrels positively impact  
108 invasive feral cat populations (Medina et al. 2008). Despite the notable invasion success of the  
109 species on the island, nothing is known about the life history traits that could have influenced  
110 their population growth.

111         The objective of this manuscript is threefold. First, we investigated the life history traits  
112 of the Barbary ground squirrel, a species with a very low introduction effort (Machado 1979;  
113 Kratzer et al. 2020). Second, we studied whether the Barbary ground squirrel's exceptional  
114 invasion success was due to a very fast life history profile through a comparison of these traits to

115 other successfully invaded mammals using the dataset provided by Capellini et al. (2015). Third,  
116 we examined whether number of founders and/or a fast life history influence invasion success of  
117 squirrels using the dataset provided by Bertolino (2009). Our results will be essential to set up  
118 effective management strategies for Barbary ground squirrels, as knowing life history traits, such  
119 as when females come into estrus or if they can breed year-round, is essential to better plan  
120 population control programs. Knowing the life history traits will also improve potential spatially  
121 explicit population models, which will be useful for future conservation programs (Bertolino et  
122 al. 2020). In a broader comparative context, our results contribute to our understanding of  
123 invasion success when introduction efforts are minimal, especially in squirrels.

124

## 125 Methods

### 126 *Life history traits of invasive Barbary ground squirrels*

127 Of the Canary Islands' seven main volcanic islands, Fuerteventura is the closest to the  
128 African continent (approximately 100 km away), the oldest, and has the second-lowest altitude  
129 (807 m a.s.l.). The island has an arid climate – high temperatures ( $\approx 20^\circ\text{C}$ ) and low rainfall (on  
130 average  $< 100$  mm/year) – characterised by trade winds, which have resulted in a semi-desert  
131 habitat (López-Darias and Lobo 2008). We studied the invasive population of Barbary ground  
132 squirrels in the northwest of Fuerteventura ( $28^\circ34'60''$  N,  $13^\circ58'0''$  W). Our study site was  
133 characterised by stony plains with xerophytic scrubland, interspersed with ravines caused by  
134 erosion and abandoned cultivated areas that are fenced by man-made rock walls and dams.

135 The semifossorial Barbary ground squirrel is a social species: adult females share  
136 sleeping burrows with other related females, and males share sleeping burrows with unrelated  
137 males and subadults of either sex (van der Marel et al. 2020). We defined these sleeping burrow

138 associations as social groups (van der Marel et al. 2020). Throughout the day, both male and  
139 female groups can be active in the same area (van der Marel et al. 2020).

140 To determine the life history traits of the species, we trapped Barbary ground squirrels  
141 using live traps (Tomahawk Co., WI, USA 13 x 13 x 40 cm) baited with peanut butter during  
142 three consecutive years (February through July 2014, January through July 2015, and January  
143 through June 2016) following the procedures described in van der Marel et al. (2019, 2020).  
144 Upon capture, we transferred squirrels to a conical handling bag (Koprowski 2002), where every  
145 adult squirrel received a passive integrated transponder (PIT) tag (Avid Identification Systems,  
146 Inc., Norco, CA, USA) for individual identification.

147 We first assessed whether there was a distinct breeding season in the Barbary ground  
148 squirrels by regularly trapping and observing male and female reproductive progress. We  
149 reported the reproductive status of adult males through the year from non-scrotal to descending  
150 scrotum, fully scrotal, and regressing scrotum. Subadult males were those individuals that have  
151 reached adult body size, were over six months old, but did not have descended testes (Waterman  
152 1996). Female subadults were individuals that have reached adult body size, were over six  
153 months of age, but their vulva and nipples were not swollen during the mating season (indicative  
154 of no reproduction). We assessed the reproductive progress of adult females by measuring  
155 gestation length from oestrus date until parturition date. We estimated the day of oestrus  
156 following previous recommendations by Pettitt et al. (2008) and Waterman (1996). Lactation  
157 length was measured from the day of parturition to juvenile emergence. We determined the  
158 parturition date by trapping and weighing the females more extensively around their expected  
159 parturition date and by palpating their lower abdomen for embryos. The nipples of immature  
160 (subadult) females are small but after their first successful parturition, the nipples elongate and



161 swell during lactation. Large bite marks surrounding the nipples indicated the weaning period.  
162 We calculated the weaning age from the day of juvenile emergence until the bite marks around  
163 the nipples of the mothers started to subside. After weaning, the nipples of adult females stay  
164 elongated but not swollen (Waterman 1996). We estimated age at first birth in females with a  
165 known date of birth. As our sample size was small, we also estimated age at first birth in females  
166 with an unknown day of birth using the known date of emergence from their natal nest burrows.  
167 For these females, we added the average lactation length to the date of emergence to estimate  
168 their age at first birth. We only used females, because we could be certain they had mated due to  
169 the swelling of their vulva and presence of copulatory plugs. As age at first birth violated the  
170 assumptions of normality and homoscedasticity of a parametric test, we tested for a difference in  
171 our two estimates (females with a known date of birth *vs.* females with a known date of juvenile  
172 emergence) using a Mann-Whitney *U* test.

173         To locate nest burrows of adult pregnant females, we fitted them with radio collars (3.6 g  
174 PD-2C transmitters, Holohil Systems Ltd., Carp, Ontario, Canada) just prior to juvenile  
175 emergence. We radiotracked the females using an R-1000 telemetry receiver (Communications  
176 Specialists, Inc., Orange, CA, USA) and a Yagi antenna model F150-3FB (Advanced Telemetry  
177 Systems, Inc., Isanti, MN, USA). Upon juvenile emergence, we extensively trapped at nest  
178 burrows to sex, measure, and mark the juveniles (individuals newly emerged from their nest  
179 burrow up to six months of age) with ear tags (#1005 Size 1 Monel, National Band and Tag Co.,  
180 Newport, KY, USA). We also determined litters per year and litter size. We used a Kruskal-  
181 Wallis test to analyse differences in average litter size across years. We calculated the litter sex  
182 ratio as the proportion of male juveniles out of the total emerged juveniles (Charnov 1982; Ryan  
183 et al. 2012), which we analysed using a chi-square test of independence. We tested whether litter

184 sex ratio differed from parity using an exact binomial test. Using a chi-square test of  
185 independence, we analysed differences in juvenile survival rate, measured as the proportion of  
186 emerged juveniles that survived to one month. Occasionally, mothers merged their litters with the  
187 litters of other adult females before all juveniles were trapped and marked, resulting in unmarked  
188 juveniles at a communal burrow. These litters were excluded because we were uncertain of the  
189 identity of the mothers. Finally, we calculated maternal success rate as the proportion of females  
190 successfully raising their litter to emergence and used a chi-square test of independence to test  
191 for differences in maternal success rate.

192         We were unable to measure neonatal body mass in the field because the females give  
193 birth within their nest burrow; therefore we used neonatal body mass recorded during an earlier  
194 study with the Barbary ground squirrels on Fuerteventura (mean  $\pm$  SE =  $8.1 \pm 0.5$  g,  $n = 5$   
195 juveniles; Machado and Domínguez 1982). We measured adult body mass using a spring scale ( $\pm$   
196 5 g; Pesola AG, Baar, Switzerland) and focused on masses outside of the reproductive period,  
197 selecting males that were non-scrotal and females prior to the breeding season or after their  
198 offspring were weaned. We measured average adult lifespan for individuals of known age and for  
199 individuals of uncertain age (individuals that did not survive into adulthood were excluded). We  
200 tested for sex differences in average lifespan using Mann-Whitney  $U$  tests. We calculated adult  
201 survival as the proportion of adults in a group that were trapped in the following field season  
202 (January 2015, 2016, and 2017). We censored adult survival for squirrels that were already adults  
203 in our first field season and were still alive in our last field season, i.e., squirrels with uncertain  
204 age. We performed the Kaplan-Meier approach on our censored data using the ‘Survival’  
205 package version 2.43-1 (Therneau and Grambsch 2000; Therneau 2015). Reproductive lifespan

206 was calculated from the maximum lifespan/longevity (5.0 year) reported in Aulagnier et al.  
207 (2013), transformed into days and age at first birth in days following Capellini et al. (2015).

208 To understand the contribution of life history traits and introduction effort to invasion  
209 success, we questioned whether the Barbary ground squirrel's exceptional invasion success  
210 (despite low introduction effort) is due to a very fast life history profile. We compared the life  
211 history profile of the Barbary ground squirrel population to the life histories of other invasive  
212 mammals and other invasive squirrels using the dataset provided by Capellini et al. (2015).  
213 These authors derived the life history data from the panTHERIA database (Jones et al. 2009),  
214 where the maximum lifespan was provided for individuals in captivity, while data in the wild  
215 exist for three out of the five introduced squirrel species. Therefore, we changed the maximum  
216 lifespan of gray squirrels to 12.5, red squirrels to 7 (Barkalow and Soots 1975) and Siberian  
217 chipmunks to 6 years (Chapuis et al. 2011). As reproductive lifespan is derived from longevity,  
218 we also changed those values for the species in question. We performed all the statistical  
219 analyses with alpha set to 0.05 in R version 3.5.1 (R Core Team 2017). We reported the mean  $\pm$   
220 standard error (*SE*).

221

### 222 *Life history vs. introduction effort in explaining the invasion success of squirrels*

223 We used a Bayesian Phylogenetic Multilevel Model to test the impact of life history traits  
224 (longevity, body mass, gestation length, weaning age, litter size, litters per year, age at first birth,  
225 and reproductive lifespan) and introduction effort (number of founders and times introduced) on  
226 the invasion status of squirrels (Bertolino 2009). For our phylogeny, we selected the squirrel  
227 species reported in Bertolino (2009) from a mammalian supertree provided by Rolland et al.  
228 (2014). In our model, we used invasion status (successfully spread or not; Bernoulli distribution)

229 as our dependent variable. We tested for collinearity between our variables using the variance  
230 inflation factor function from the ‘CAR’ package version 3.0-2 (Fox and Weisberg 2011) and  
231 excluded covariates with a variance inflation factor value above three. We included the number  
232 of founders, weaning age, litters per year, and age at first birth as our covariates (ESM 1) and  
233 standardised these variables. We used species as a random factor to account for any effects that  
234 are independent of the phylogenetic relationship between species as we had multiple introduction  
235 events per species (n = 8 species ranging between 1 and 28 introduction events with 878 data  
236 points in total, Bertolino 2009). We also accounted for the phylogenetic signal between species.  
237 We ran two models, one without added variability of the independent variables within species  
238 and one with it. As only the number of founders was variable per species, we only had to account  
239 for this covariate. We used the ‘get\_prior’ function to set our prior. As settings for our model, we  
240 used three chains, two cores, 10000 iterations, and 1500 as the warmup (burnin), and we set the  
241 ‘adapt\_delta’ to 0.99. We visually inspected for model convergence and we assessed mixing by  
242 ensuring that the effective sample sizes for all parameters were above 1000. We selected the  
243 model with the lowest loo information criterion (Vehtari et al. 2017). We assessed the influence  
244 of each independent variable on invasion status by analyzing whether the posterior distribution  
245 crosses zero. If the posterior distribution of the parameter estimates ( $\beta$ ) crosses zero then that  
246 variable has a negligible effect on the dependent variable, whereas if it substantially shifted from  
247 zero then that variable has an influential effect. For this analysis, we used the R package ‘brms’  
248 (Bürkner 2017, 2018) from the Stan environment (<http://mc-stan.org/>). We performed the  
249 statistical analyses in R version 4.0.1 (R Core Team 2020) and provided the R code on a Github  
250 repository ([https://github.com/annemarievdmarel/lifehistory\\_invasion](https://github.com/annemarievdmarel/lifehistory_invasion); van der Marel 2020).  
251

252 Results

253 *Life history traits of invasive Barbary ground squirrels*

254           Reproduction in Barbary ground squirrels was seasonal; in 2014, mating started at the  
255 end of January and ended mid-March (reproductive progress observed for 32 males and 40  
256 females), whereas in 2015 ( $n = 52$  males and 69 females) and 2016 ( $n = 55$  males and 82  
257 females) mating started at the beginning of January and late December and ended mid-February  
258 and at the end of January, respectively. Males were scrotal for  $76.3 \pm 4.0$  days ( $n = 65$ ) after the  
259 last day of the mating period, except for 8 subadult males in 2014 and one in 2016. It took adult  
260 males on average  $152.1 \pm 5.0$  days ( $n = 54$ ) to fully regress their scrota. Within each social group,  
261 all adult females bred. Gestation length was  $43.5 \pm 0.4$  days (range 39-49 days;  $n = 47$  females)  
262 and lactation lasted  $42.3 \pm 0.5$  days (range 39-46 days;  $n = 43$  females). Most females produced  
263 their first litter when they are approximately one year old, except for the six subadults in 2014.  
264 The estimates of age at first birth (primiparity) calculated for females with a known date of birth  
265 ( $343.4 \pm 11.0$  days,  $n = 8$ ) and for females with a known date of emergence ( $345.5 \pm 5.7$  days,  $n$   
266  $= 15$ ) did not differ (Mann-Whitney  $U$  test:  $U = 53$ ,  $P = 0.67$ ). Therefore, the average age of first  
267 birth was  $344.8 \pm 5.2$  days ( $n = 23$  females).

268           Over two years (2015 and 2016), 15 of 138 pregnancies failed (10.9%). Females rebred  
269 in 11 of these failed pregnancies (73.3%), although five of these later pregnancies failed again  
270 (45.5%). Maternal success rate (proportion of females that successfully raised their litter to  
271 emergence) did not differ among years (2014: 0.78, 2015: 0.76, and 2016: 0.79; chi-square test  
272 of independence:  $\chi^2_2 = 0.71$ ,  $P = 0.70$ ). In 2016, eight females of a total of 80 (10.0%) were  
273 observed to have a second litter in one breeding season after they had successfully bred once, but  
274 we do not have data on their litters because we left the field before the emergence of these late

275 litters. In 2014, 112 juveniles emerged from 28 litters; in 2015, 161 juveniles from 44 litters; and  
276 in 2016, 166 juveniles from 63 litters. Average litter size did not differ among years (2014:  $2.3 \pm$   
277  $0.3$ , 2015:  $3.4 \pm 0.4$ , and 2016:  $3.1 \pm 0.2$ ; Kruskal-Wallis test:  $H_2 = 3.91$ ,  $P = 0.14$ ). The mean  
278 percentage of adult females that were successful in raising one litter during the three years was  
279  $75.5 \pm 2.0\%$ , with a litter size of  $3.0 \pm 0.2$  [1 – 8] juveniles per litter ( $n = 62$  litters). Litter sex  
280 ratio was 0.50 male across all years and did not differ among years (2014: 0.50, 2015: 0.47, and  
281 2016: 0.52; chi-square test of independence:  $\chi^2_2 = 0.24$ ,  $P = 0.89$ ), nor did it differ from parity  
282 (exact binomial test: two-tailed  $P = 1.0$ , 95%-CI = [0.42 - 0.59],  $n = 45$  litters from 40 distinct  
283 females). Juvenile mortality was significantly lower in 2014 (19.4%) compared to 2015 (50.3%)  
284 and 2016 (49.4%), respectively ( $\chi^2_2 = 31.24$ ,  $P < 0.001$ ).

285         Average adult body mass outside of the reproductive season was  $221.1 \pm 5.7$  g ( $n = 116$   
286 individuals) with males weighing  $227.0 \pm 6.4$  g ( $n = 51$ ), and females weighing  $204.0 \pm 5.0$  g  
287 ( $n = 65$ ). As average lifespan did not differ between adult males and females (lifespan of  
288 individuals of known age, Mann-Whitney  $U$  test:  $U = 247.5$ ,  $P = 0.20$ ; and lifespan of  
289 individuals of uncertain age included,  $U = 10187$ ,  $P = 0.95$ ), we combined the sexes. The  
290 estimated average lifespan of the Barbary ground squirrel in our sites calculated over three years  
291 was  $1.48 \pm 0.09$  years of age for individuals with known age ( $n = 52$ ), but  $1.76 \pm 0.06$  years  
292 when individuals with uncertain age were included ( $n = 239$ ). The survival rate did not differ  
293 between males and females ( $P = 0.41$ ) and was  $0.89 \pm 0.02$ ,  $0.79 \pm 0.03$ , and  $0.73 \pm 0.04$  at age 1,  
294 2, and 3 years, respectively. Reproductive lifespan calculated using the maximum  
295 lifespan/longevity of five years (Aulagnier et al., 2013) was 1480.2 days (4.1 years).

296         The life history traits of Barbary ground squirrels were all lower compared to the traits of  
297 other invasive mammals, except for litter size, weaning age and litters per year (Table 1, Fig. 2).

298

299 *Life history vs. introduction effort in explaining the invasion success of squirrels*

300       The model without added variability of the independent variables within species  
301 (looic = 71.7) best explained whether squirrels were successful invaders in comparison to the  
302 model with added variability of the independent variables within species (looic = 82.6).  
303 However, neither number of founders, nor life history characteristics explained invasion status of  
304 introduced squirrels (Fig. 3), as all the posterior distributions of the covariates crossed zero  
305 (Fig. 4). We found effects that were both dependent and independent of the phylogenetic  
306 relationship between species (random effect species: 95% CI = [0.01 – 1.99] and phylogenetic  
307 signal: 95% CI = [0.04 – 4.13]).

308

309 Discussion

310       Our study provides the first detailed data on the life history and population dynamics of  
311 an invasive population of Barbary ground squirrels, a population with one of the lowest  
312 introduction efforts (one pair or three individuals as founders from one source location, Kratzer  
313 et al. 2020), but a great invasion success (López-Darias 2007). The Barbary ground squirrel  
314 represents the fast end of the “fast-slow continuum” of life history traits, because they are  
315 small-bodied (Machado and Domínguez 1982, this study), mature within their first year and  
316 females have large and frequent litters. Barbary ground squirrels’ exceptional invasion success  
317 (despite low introduction effort, Kratzer et al. 2020) is not due to a remarkable fast life history  
318 profile, as their life history is comparable to other invasive species that do not have such a low  
319 introduction effort. When we analysed the effects of introduction effort and life history traits  
320 further, we found that neither number of founders nor life history traits influenced invasion status

321 of introduced squirrel species. These results suggest that especially for squirrels, other traits  
322 besides introduction effort and life history traits influence their probability to successfully invade  
323 a new range (e.g., Signorile et al. 2014; Mori et al. 2018b), which we discuss further below.

324

### 325 *Potential factors influencing invasion success of Barbary ground squirrels*

326 The Barbary ground squirrel can be considered a genetic paradox of invasion (Estoup et  
327 al. 2016). The invaded population was founded by 2 or 3 individuals, which has resulted in a low  
328 genetic diversity and a high level of inbreeding in the invasive population (Kratzer et al. 2020). A  
329 high degree of inbreeding could lead to inbreeding depression, i.e., a high impact of deleterious  
330 alleles on the average fitness of offspring (Ralls et al. 1979; Ralls and Ballou 1982). However, in  
331 this particular case of the Barbary ground squirrel, with a population in the introduced range  
332 estimated at around one million individuals (López-Darias 2007), argues against inbreeding  
333 depression, because this population has successfully reproduced and grown. Although we have  
334 shown that the squirrels have a fast life history, this factor alone could not explain their invasion  
335 success. Besides a fast life history, other aspects, such as anthropogenic, habitat or species-level  
336 factors, may have favoured their invasion success. First, multiple anthropogenic translocations of  
337 the initial founder population (Machado 1979; Machado and Domínguez 1982; López-Darias,  
338 unpubl. data) may have had a significant effect on the invasion success of the Barbary ground  
339 squirrel.

340 Second, climatically matched habitat characteristics could impact the adaptive potential  
341 and population growth of an introduced species in their new range (Lodge 1993; Kolar and  
342 Lodge 2001; Forsyth et al. 2004; Hayes and Barry 2008). For Barbary ground squirrels, climate  
343 conditions of the source location (Sidi Ifni, Morocco, Machado 1979; 133 mm rainfall/year and



344 19.2 °C, Merkel, 2019) are very similar to the habitat on Fuerteventura (Machado 1979; <100  
345 mm rainfall/year and ~ 20 °C, López-Darias and Lobo 2008). Since the climate is so similar, it is  
346 no surprise that climate did not affect the squirrel's abundance in their invasive range (López-  
347 Darias and Lobo 2008). As well, habitat preferences are similar between the native (Rihane et al.  
348 2019) and the invasive range (López-Darias and Lobo 2008). Moreover, Barbary ground  
349 squirrels are reported to have a low diversity of parasites (López-Darias et al. 2008b), and a  
350 lower number of predator species (species richness) in the invasive range (Gangoso et al. 2006;  
351 Medina et al. 2008) compared to the native range (Machado 1979). Additionally, the main  
352 current aerial predator (the Eurasian buzzard) had an atypically small population at the time the  
353 squirrels were introduced (Gangoso et al. 2006), suggesting a release from predation around the  
354 establishment stage of Barbary ground squirrels. Only 2% of the diet of the only terrestrial  
355 predator of the Barbary ground squirrel, feral cats, consists of the squirrels (Medina et al. 2008).  
356 Nevertheless, predation pressure may still be significant if the number of feral cats is large. No  
357 information regarding the population size of feral cats is available, but cats were introduced to  
358 the Canarian archipelago in the 15<sup>th</sup> century and are now present in every habitat of each main  
359 island (Medina et al. 2008). Feral cats are not only potential predators of the squirrels but they  
360 are also a problem for wildlife conservation, especially on islands (Medina et al. 2011; Doherty  
361 et al. 2016). Overall, Fuerteventura can be considered a suitable environment for the Barbary  
362 ground squirrel (López-Darias et al. 2008a).

363         Barbary ground squirrels also may have become successful invaders due to behavioural  
364 advantages, as favourable behavioural traits promote success at each stage of the invasion  
365 (Holway and Suarez 1999; Chapple et al. 2012; Carere and Gherardi 2013). Species with  
366 increased interspecific or decreased intraspecific aggression, and behaviours enhancing their

367 dispersal, e.g., exploration, activity, and boldness, should perform better in their new habitat  
368 (Holway and Suarez 1999). These behavioural traits have been hypothesised to represent an  
369 invasion syndrome (Sih et al. 2004; Chapple et al. 2012), and can be linked to life history traits,  
370 which then result in “pace-of-life” syndromes (Réale et al. 2010). Often species with a fast pace-  
371 of-life syndrome, i.e., more explorative and bold species, have lower survival chances because  
372 they are more exposed to predators and parasites (Réale et al. 2010). For introduced species, a  
373 fast pace-of-life may be advantageous since fewer predators and parasites result in higher  
374 survival chances. In Barbary ground squirrels, this hypothesis is supported, because more  
375 explorative individuals are better at avoiding predation, resulting in greater survival chances  
376 (Piquet et al. 2018).

377         To conclude, generalist species – species not specialised in habitat use or diet – are  
378 suggested to better adapt to a variable environment and to have a better chance of becoming  
379 successful than specialist species (Fisher and Owens 2004). The Barbary ground squirrel has a  
380 generalist diet because they are omnivorous and eat not only seeds, nuts, and fruits, but also  
381 native mollusks (Machado and Domínguez 1982; López-Darias and Nogales 2008). Additionally,  
382 we have recorded them feeding on the horns and hooves of goat carcasses (van der Marel, pers.  
383 obs.), supporting the suggestion that the squirrels could be mineral-limited (Machado 1979). A  
384 generalist diet could have helped the squirrels survive dry years with scarce resources, as they  
385 would have a wider niche breadth and not depend on a limiting resource. For example, in  
386 Darwin’s tree finches, generalist species have a more varied diet in dry years compared to wet  
387 years (Christensen and Kleindorfer 2009). Thus, multiple different aspects could have helped the  
388 squirrels overcome barriers in their introduced range.

389

390 *Life history vs. introduction effort in explaining the invasion success of squirrels*

391           Neither introduction effort measured as the number of founders nor life history traits  
392 affected the invasion status of squirrels as all the posterior distributions of the covariates crossed  
393 zero. The life history traits may not be varied enough among the related squirrel species studied  
394 here to show any effects on invasion status, as we do see an effect of phylogeny in our model. It  
395 seems counterintuitive that introduction effort does not impact invasion success, because  
396 multiple advantages are associated with a high introduction effort (Lockwood et al. 2005;  
397 Colautti et al. 2006; Simberloff 2009; Blackburn et al. 2015).

398           First, multiple introduction events increase fitness (Keller and Taylor 2010) and  
399 eventually genetic diversity (Dlugosch and Parker 2008). Genetic diversity loss is U-shaped  
400 when plotted against time since first introduction, suggesting that an invasive population regains  
401 its genetic diversity over time, which can be promoted when multiple introduced populations  
402 connect (Dlugosch and Parker 2008).

403           Second, more founders reduce the risk of extinction and promote adaptability to the new  
404 environment through increased genetic diversity (Dlugosch and Parker 2008; Blackburn et al.  
405 2015). For example, lower genetic diversity caused by a small number of founders reduced the  
406 spread rate of grey squirrels (Signorile et al. 2014). Still, the species did successfully spread  
407 despite a low introduction effort, albeit slower, suggesting that a loss in genetic diversity does  
408 not imply a loss in the adaptive potential of an introduced species *per se* (Dlugosch and Parker  
409 2008). Instead, the probability for population growth from a small founding population in tree  
410 squirrels may be attributed to a high reproductive output (Wood et al. 2007).

411           Additionally, climate and habitat suitability may be a better predictor for invasion success  
412 than the number of founders or a fast life history in squirrels, similar to mammals introduced to

413 Australia (Forsyth et al. 2004). Normally, demographic stochasticity negatively affects  
414 population growth in small populations; however, other factors unrelated to demographic  
415 stochasticity, such as unsuitable habitat or climate, may negatively impact large populations as  
416 well (Blackburn et al. 2015). As such, small populations may then persist when other factors,  
417 such as climate and habitat suitability, work instead in their favour.

418         Also, other factors may help species become invasive with low introduction effort. For  
419 example, the invasion success of Siberian chipmunks is influenced by food provisioning by  
420 humans, especially in urban environments, and the absence of competitors at the time of  
421 introduction (Mori et al. 2019). Thus, for squirrel species particularly, other factors – climate and  
422 habitat suitability, enemy release, a fast life history – can be better predictors of invasion success  
423 than introduction effort.

424

#### 425 *Concluding remarks and future studies*

426         Barbary ground squirrels have a fast life history strategy resulting in rapid population  
427 growth. If these life history traits have not changed since 1965, their fast life history may have  
428 contributed to their invasion success with an extremely low introduction effort on Fuerteventura  
429 Island, together with favourable behavioural traits, a generalist diet and good resources, enemy  
430 release, and similar habitats and climate. Only by understanding their basic biology will we be in  
431 the position to control and minimise the ecological damage this species causes in their new  
432 habitat. For a future study, we could run a population model to predict how long it would take for  
433 a pair of squirrels to spread across the island or to evaluate the necessary effort to control the  
434 population or reduce the number of squirrels on Fuerteventura, while taking the factors

435 influencing their invasion success into account (Merrick and Koprowski 2017; Bertolino et al.  
436 2020).

437 Our study also aids in constructing a comprehensive framework on the factors, including  
438 life history traits and introduction effort, influencing invasion success in mammals. For  
439 introduced squirrels, suitable climate or habitat may be more important predictors whether a  
440 species becomes a successful invader than introduction effort or life history traits alone. Our  
441 results contradict the concept that introduction effort is the key factor influencing invasion  
442 success (Lockwood et al. 2005; Simberloff 2009); instead, we argue that the invasion success can  
443 be influenced by multiple aspects of the new habitat or the biology of the introduced species.  
444

#### 445 Acknowledgements

446 We thank the owners of our study sites for access to their lands, the Cabildo of  
447 Fuerteventura for access at the Estación Biológica de la Oliva, and the IPNA-CSIC for logistical  
448 support. We thank E. Anjos for providing useful feedback.  
449

#### 450 Declarations

451 Funding: This study was funded by a University of Manitoba Faculty of Science graduate  
452 studentship and a Faculty of Graduate Studies Graduate Enhancement of the Tri-Council Stipend  
453 (GETS) to AM, by Cabildo de Tenerife, Program TF INNOVA 2016-21 (with MEDI & FDCAN  
454 Funds) (P. INNOVA 2016-2021) to MLD, and the Natural Sciences and Engineering Research  
455 Council of Canada (#04362), the Canadian Foundation for Innovation, and the University of  
456 Manitoba University Research Grant Program to JMW.

457 Conflict of interest: The authors declare that they have no conflict of interest

458 Ethics approval: All procedures conformed to the guidelines of the American Society of  
459 Mammalogists for the use of wild mammals in research, were approved by the University of  
460 Manitoba Animal Care and Use Committee (protocol #F14-032) and were permitted by the  
461 government of Fuerteventura (Cabildo Insular de Fuerteventura #14885).

462 Consent to participate: Not applicable

463 Consent for publication: All authors whose names appear on the submission approved the  
464 version to be published.

465 Availability of data and material: The datasets analysed during the current study are available in  
466 the Github repository, [https://github.com/annemarievdmarel/lifehistory\\_invasion](https://github.com/annemarievdmarel/lifehistory_invasion) (DOI:  
467 10.5281/zenodo.4136880).

468 Code availability: The code used during the current study are available in the Github repository,  
469 [https://github.com/annemarievdmarel/lifehistory\\_invasion](https://github.com/annemarievdmarel/lifehistory_invasion) (DOI: 10.5281/zenodo.4136880).

470 Authors' contributions: AM, JMW and MLD conceived and designed the study and collected the  
471 data. AM analyzed the data and wrote the manuscript; JMW and MLD provided editorial advice.  
472

473 Literature cited

474 Allen WL, Street SE, Capellini I (2017) Fast life history traits promote invasion success in  
475 amphibians and reptiles. *Ecol Lett* 20:222–230. <https://doi.org/10.1111/ele.12728>

476 Aulagnier S, Gouat P, Thévenot M (2013) *Atlantoxerus getulus* BARBARY GROUND  
477 SQUIRREL. In: Happold DCD (ed) *Mammals of Africa: Volume III*. Bloomsbury  
478 Publishing, London, pp 43–44

479 Bañares A, Blanca G, Güemes J, et al (2003) *Atlas y Libro Rojo de la Flora Vasculare Amenazada*  
480 *de España*. Dirección General de Conservación de la Naturaleza. Madrid

- 481 Barkalow FS, Soots RF (1975) Life span and reproductive longevity of the gray squirrel, *Sciurus*  
482 *c. carolinensis* Gmelin. J Mammal 56:522–524
- 483 Basso R, Vannuccini ML, Nerva L, et al (2019) Multiple origins of the common chameleon in  
484 southern Italy. Herpetozoa 32:11–19. <https://doi.org/10.3897/herpetozoa.32.e35611>
- 485 Bellard C, Cassey P, Blackburn TM (2016) Alien species as a driver of recent extinctions. Biol  
486 Lett 12:20150623. <https://doi.org/10.1098/rsbl.2015.0623>
- 487 Benitez V V., Almada Chavez S, Gozzi AC, et al (2013) Invasion status of Asiatic red-bellied  
488 squirrels in Argentina. Mamm Biol 78:164–170.  
489 <https://doi.org/10.1016/j.mambio.2012.10.002>
- 490 Bertolino S (2009) Animal trade and non-indigenous species introduction: the world-wide spread  
491 of squirrels. Divers Distrib 15:701–708. <https://doi.org/10.1111/j.1472-4642.2009.00574.x>
- 492 Bertolino S, Lurz PWW (2013) *Callosciurus* squirrels: worldwide introductions, ecological  
493 impacts and recommendations to prevent the establishment of new invasive populations.  
494 Mamm Rev 43:22–33. <https://doi.org/10.1111/j.1365-2907.2011.00204.x>
- 495 Bertolino S, Sciandra C, Bosso L, et al (2020) Spatially explicit models as tools for  
496 implementing effective management strategies for invasive alien mammals. Mamm Rev  
497 50:187–199. <https://doi.org/10.1111/mam.12185>
- 498 Bielby J, Mace GM, Bininda-Emonds ORP, et al (2007) The fast–slow continuum in  
499 mammalian life history: An empirical reevaluation. Am Nat 169:748–757.  
500 <https://doi.org/10.1086/516847>
- 501 Blackburn TM, Lockwood JL, Cassey P (2015) The influence of numbers on invasion success.  
502 Mol Ecol 24:1942–1953. <https://doi.org/10.1111/mec.13075>
- 503 Blackburn TM, Pyšek P, Bacher S, et al (2011) A proposed unified framework for biological

- 504           invasions. *Trends Ecol Evol* 26:333–339. <https://doi.org/10.1016/j.tree.2011.03.023>
- 505   Bürkner PC (2017) brms: An R package for Bayesian multilevel models using Stan. *J Stat Softw*
- 506           80:. <https://doi.org/10.18637/jss.v080.i01>
- 507   Bürkner PC (2018) Advanced Bayesian multilevel modeling with the R package brms. *R J*
- 508           10:395–411. <https://doi.org/10.32614/rj-2018-017>
- 509   Capellini I, Baker J, Allen WL, et al (2015) The role of life history traits in mammalian invasion
- 510           success. *Ecol Lett* 18:1099–1107. <https://doi.org/10.1111/ele.12493>
- 511   Carere C, Gherardi F (2013) Animal personalities matter for biological invasions. *Trends Ecol*
- 512           *Evol* 28:5–6. <https://doi.org/10.1016/j.tree.2012.10.006>
- 513   Chapple DG, Simmonds SM, Wong BBM (2012) Can behavioral and personality traits influence
- 514           the success of unintentional species introductions? *Trends Ecol Evol* 27:57–62.
- 515           <https://doi.org/10.1016/j.tree.2011.09.010>
- 516   Chapuis J-L, Obolenskaya E, Pisanu B, Lissovsky A (2011) Datasheet on *Tamias sibiricus*. In:
- 517           CABI, Wellingford, UK. <https://www.cabi.org/isc/datasheet/62788> accessed 19 December
- 518           2020
- 519   Charnov EL (1982) *The theory of sex allocation*. Princeton University Press, Princeton (NJ)
- 520   Christensen R, Kleindorfer S (2009) Jack-of-all-trades or master of one? Variation in foraging
- 521           specialisation across years in Darwin’s Tree Finches (*Camarhynchus* spp.). *J Ornithol*
- 522           150:383–391. <https://doi.org/10.1007/s10336-008-0358-y>
- 523   Colautti RI, Grigorovich IA, MacIsaac HJ (2006) Propagule pressure: A null model for
- 524           biological invasions. *Biol Invasions* 8:1023–1037. <https://doi.org/10.1007/s10530-005->
- 525           3735-y
- 526   Colautti RI, Ricciardi A, Grigorovich IA, MacIsaac HJ (2004) Is invasion success explained by



527 the enemy release hypothesis? *Ecol Lett* 7:721–733. <https://doi.org/10.1111/j.1461->  
528 0248.2004.00616.x

529 Culina A, Linton DM, Pradel R, et al (2019) Live fast, don't die young: Survival-reproduction  
530 trade-offs in long-lived income breeders. *J Anim Ecol* 1–11. <https://doi.org/10.1111/1365->  
531 2656.12957

532 Dlugosch KM, Parker IM (2008) Founding events in species invasions: genetic variation,  
533 adaptive evolution, and the role of multiple introductions. *Mol Ecol* 17:431–49.  
534 <https://doi.org/10.1111/j.1365-294X.2007.03538.x>

535 Dobson FS, Oli MK (2007a) Fast and slow life histories of mammals. *Ecoscience* 14:292–299.  
536 <https://doi.org/10.1139/z11-033>

537 Dobson FS, Oli MK (2007b) Fast and slow life histories of rodents. In: Wolff JO, Sherman PW  
538 (eds) *Rodent Societies. An Ecological and Evolutionary Perspective*. The University of  
539 Chicago Press, Chicago and London, pp 99–105

540 Doherty TS, Glen AS, Nimmo DG, et al (2016) Invasive predators and global biodiversity loss.  
541 *Proc Natl Acad Sci U S A* 113:11261–11265. <https://doi.org/10.1073/pnas.1602480113>

542 Estoup A, Ravigné V, Hufbauer R, et al (2016) Is there a genetic paradox of biological invasion?  
543 *Annu Rev Ecol Evol Syst* 47:51–72. <https://doi.org/10.1146/annurev-ecolsys-121415->  
544 032116

545 Fisher DO, Owens IPF (2004) The comparative method in conservation biology. *Trends Ecol*  
546 *Evol* 19:391–8. <https://doi.org/10.1016/j.tree.2004.05.004>

547 Forsyth DM, Duncan RP, Bomford M, Moore G (2004) Climatic suitability, life-history traits,  
548 introduction effort, and the establishment and spread of introduced mammals in Australia.  
549 *Conserv Biol* 18:557–569

- 550 Fox J, Weisberg S (2011) An {R} companion to applied regression, second edition. SAGE  
551 Publications, Inc
- 552 Gabry J, Simpson D, Vehtari A, et al (2019) Visualization in Bayesian workflow. *J. R. Stat. Soc.*  
553 182:389–402. <https://doi.org/10.1111/rssa.12378>
- 554 Gallardo B, Clavero M, Sánchez MI, Vilà M (2016) Global ecological impacts of invasive  
555 species in aquatic ecosystems. *Glob Chang Biol* 22:151–163.  
556 <https://doi.org/10.1111/gcb.13004>
- 557 Gangoso L, Donázar JA, Scholz S, et al (2006) Contradiction in conservation of island  
558 ecosystems: plants, introduced herbivores and avian scavengers in the Canary Islands.  
559 *Biodivers Conserv* 15:2231–2248. <https://doi.org/10.1007/s10531-004-7181-4>
- 560 Groh K, García A (2004) Phylum Mollusca. In: Izquierdo I, Martín JL, Zurita N, Arechavaleta M  
561 (eds) *Lista de especies silvestres de Canarias (hongos, plantas y animales terrestres)*.  
562 Consejería de Medio Ambiente y Ordenación Territorial, Gobierno de Canarias. pp 149–154
- 563 Hayes KR, Barry SC (2008) Are there any consistent predictors of invasion success? *Biol*  
564 *Invasions* 10:483–506. <https://doi.org/10.1007/s10530-007-9146-5>
- 565 Holway DA, Suarez A V (1999) Animal behavior: an essential component of invasion biology.  
566 *Trends Ecol Evol* 14:328–330. [https://doi.org/10.1016/S0169-5347\(99\)01636-5](https://doi.org/10.1016/S0169-5347(99)01636-5)
- 567 Hutterer R (2008) *Crocidura canariensis*. In: IUCN Red List Threat. Species.  
568 [www.iucnredlist.org](http://www.iucnredlist.org). Accessed 20 Feb 2015
- 569 IPBES (2019) Global assessment report on biodiversity and ecosystem services of the  
570 Intergovernmental Science-Policy Platform on Biodiversity and Ecosystem Services.  
571 Brondizio ES, Settele J, Díaz S, Ngo HT (eds). IPBES secretariat, Bonn, Germany, p XXX
- 572 IUCN (2008) *Atlantoxerus getulus*. In: IUCN Red List Threat. Species.

- 573 <https://www.iucnredlist.org>. Accessed 16 Dec 2020
- 574 Jones KE, Bielby J, Cardillo M, et al (2009) PanTHERIA: a species-level database of life  
575 history, ecology, and geography of extant and recently extinct mammals. *Ecology* 90:2648–  
576 2648. <https://doi.org/10.1890/08-1494.1>
- 577 Keller SR, Taylor DR (2010) Genomic admixture increases fitness during a biological invasion. *J*  
578 *Evol Biol* 23:1720–1731. <https://doi.org/10.1111/j.1420-9101.2010.02037.x>
- 579 Kolar CS, Lodge DM (2001) Progress in invasion biology: predicting invaders. *Trends Ecol Evol*  
580 16:199–204
- 581 Koprowski JL (2002) Handling tree squirrels with a safe and efficient restraint. *Wildl Soc Bull*  
582 30:101–103
- 583 Kratzer K V, van der Marel A, Garroway C, et al (2020) Evidence for an extreme founding effect  
584 in a highly successful invasive species. *bioRxiv* 2020.08.04:  
585 <https://doi.org/10.1101/2020.08.04.236695>
- 586 Lawton C, Cowan P, Bertolino S, et al (2010) The consequences of introducing non-indigenous  
587 species: two case studies, the grey squirrel in Europe and the brushtail possum in New  
588 Zealand. *Rev. sci. tech. Off. int. Epiz.* 29:287–298.  
589 <https://doi.org/https://dx.doi.org/10.1097/JTO.0b013e31828b5228>
- 590 Le Roux JJ, Wieczorek AM, Meyer JY (2008) Genetic diversity and structure of the invasive tree  
591 *Miconia calvescens* in Pacific islands. *Divers Distrib* 14:935–948.  
592 <https://doi.org/10.1111/j.1472-4642.2008.00504.x>
- 593 Liu C, Comte L, Olden JD (2017) Heads you win, tails you lose: Life-history traits predict  
594 invasion and extinction risk of the world’s freshwater fishes. *Aquat Conserv Mar Freshw*  
595 *Ecosyst* 27:773–779. <https://doi.org/10.1002/aqc.2740>

- 596 Lockwood JL, Cassey P, Blackburn T (2005) The role of propagule pressure in explaining  
597 species invasions. *Trends Ecol Evol* 20:223–228. <https://doi.org/10.1016/j.tree.2005.02.004>
- 598 Lodge D (1993) Biological invasions: lessons for ecology. *Trends Ecol Evol* 8:133–136
- 599 López-Darias M (2007) Ecology of invasions: the case of the Barbary ground squirrel  
600 (*Atlantoxerus getulus*) in Fuerteventura Island (Canary Islands). PhD thesis, University of  
601 La Laguna. San Cristóbal de La Laguna, Spain
- 602 López-Darias M (2008) *Atlantoxerus getulus* Linnaeus, 1758. [http://www.interreg-](http://www.interreg-bionatura.com/especies/pdf/Atlantoxerus_getulus.pdf)  
603 [bionatura.com/especies/pdf/Atlantoxerus getulus.pdf](http://www.interreg-bionatura.com/especies/pdf/Atlantoxerus_getulus.pdf) accessed 18 January 2019
- 604 López-Darias M, Lobo JM (2008) Factors affecting invasive species abundance: the Barbary  
605 Ground Squirrel on Fuerteventura Island, Spain. *Zool Stud* 47:268–281
- 606 López-Darias M, Lobo JM, Gouat P (2008a) Predicting potential distributions of invasive  
607 species: the exotic Barbary ground squirrel in the Canarian archipelago and the west  
608 Mediterranean region. *Biol Invasions* 10:1027–1040. [https://doi.org/10.1007/s10530-007-](https://doi.org/10.1007/s10530-007-9181-2)  
609 [9181-2](https://doi.org/10.1007/s10530-007-9181-2)
- 610 López-Darias M, Nogales M (2008) Effects of the invasive Barbary ground squirrel  
611 (*Atlantoxerus getulus*) on seed dispersal systems of insular xeric environments. *J Arid*  
612 *Environ* 72:926–939. <https://doi.org/10.1016/j.jaridenv.2007.12.006>
- 613 López-Darias M, Nogales M (2016) Raptors as legitimate secondary dispersers of weed seeds.  
614 *Ibis* 158:428–432. <https://doi.org/10.1111/ibi.12360>
- 615 López-Darias M, Ribas A, Feliú C (2008b) Helminth parasites in native and invasive mammal  
616 populations: comparative study on the Barbary ground squirrel *Atlantoxerus getulus* L.  
617 (Rodentia, Sciuridae) in Morocco and the Canary Islands. *Acta Parasitol* 53:296–301.  
618 <https://doi.org/10.2478/s11686-008-0036-5>

- 619 Lorenzo-Morales J, López-Darias M, Martínez-Carretero E, Valladares B (2007) Isolation of  
620 potentially pathogenic strains of *Acanthamoeba* in wild squirrels from the Canary Islands  
621 and Morocco. *Exp Parasitol* 117:74–79. <https://doi.org/10.1016/j.exppara.2007.03.014>
- 622 Machado A (1979) The introduction of the Getulian squirrel (*Atlantoxerus getulus* L., 1758) in  
623 Fuerteventura, Canary Islands. *Egypt J Wildl Nat Resour* 2:182–202
- 624 Machado A, Domínguez F (1982) Estudio sobre la presencia de la Ardilla Moruna (*Atlantoxerus*  
625 *getulus* L.) en la isla de Fuerteventura; su introducción, su biología y su impacto en el  
626 medio. Santa Cruz de Tenerife, Spain
- 627 Markula A, Hannan-Jones M, Csurhes S (2016) Invasive animal risk assessment - Indian myna  
628 *Acridotheres tristis*. Department of Agriculture and Fisheries, State of Queensland,  
629 Australia.
- 630 Medina FM, Bonnaud E, Vidal E, et al (2011) A global review of the impacts of invasive cats on  
631 island endangered vertebrates. *Glob Chang Biol* 17:3503–3510.  
632 <https://doi.org/10.1111/j.1365-2486.2011.02464.x>
- 633 Medina FM, López-Darias M, Nogales M, García R (2008) Food habits of feral cats (*Felis*  
634 *silvestris catus* L.) in insular semiarid environments (Fuerteventura, Canary Islands). *Wildl*  
635 *Res* 35:162–169. <https://doi.org/10.1071/WR07108>
- 636 Merkel A. (2019) Climate Data. <https://en.climate-data.org/>. Accessed 29 Jan 2019
- 637 Merrick MJ, Koprowski JL (2017) Should we consider individual behavior differences in applied  
638 wildlife conservation studies? *Biol Conserv* 209:34–44.  
639 <https://doi.org/10.1016/j.biocon.2017.01.021>
- 640 Mori E, Menchetti M, Zozzoli R, Milanesi P (2019) The importance of taxonomy in species  
641 distribution models at a global scale: the case of an overlooked alien squirrel facing

- 642 taxonomic revision. *J Zool* 307:43–52. <https://doi.org/10.1111/jzo.12616>
- 643 Mori E, Milanesi P, Menchetti M, et al (2018a) Genetics reveals that free-ranging chipmunks  
644 introduced to Italy have multiple origins. *Hystrix* 29:239–242.  
645 <https://doi.org/10.4404/hystrix-00116-2018>
- 646 Mori E, Zozzoli R, Menchetti M (2018b) Global distribution and status of introduced Siberian  
647 chipmunks *Eutamias sibiricus*. *Mamm Rev* 48:139–152. <https://doi.org/10.1111/mam.12117>
- 648 Pettitt BA, Waterman JM, Wheaton CJ (2008) Assessing the effects of resource availability and  
649 parity on reproduction in female Cape ground squirrels: resources do not matter. *J Zool*  
650 276:291–298. <https://doi.org/10.1111/j.1469-7998.2008.00491.x>
- 651 Piquet JC, López-Darias M, van der Marel A, et al (2018) Unraveling behavioral and pace-of-life  
652 syndromes in a reduced parasite and predation pressure context: personality and survival of  
653 the Barbary ground squirrel. *Behav Ecol Sociobiol* 72:147. [https://doi.org/10.1007/s00265-](https://doi.org/10.1007/s00265-018-2549-8)  
654 [018-2549-8](https://doi.org/10.1007/s00265-018-2549-8)
- 655 Promislow DEL, Harvey PH (1990) Living fast and dying young: A comparative analysis of life-  
656 history variation among mammals. *J Zool Soc London* 220:417–437
- 657 R Core Team (2017) R: A language and environment for statistical computing. R Foundation for  
658 Statistical Computing, Vienna, Austria. <https://www.R-project.org/>.
- 659 R Core Team (2020) R: A language and environment for statistical computing. R Foundation for  
660 Statistical Computing, Vienna, Austria. <https://www.R-project.org/>.
- 661 Ralls K, Ballou J (1982) Effect of inbreeding on juvenile mortality in some small mammal  
662 species. *Lab Anim* 16:159–166. <https://doi.org/10.1258/002367782781110151>
- 663 Ralls K, Brugger K, Ballou J (1979) Inbreeding and juvenile mortality in small populations of  
664 ungulates. *Science* 206:1101–1103

- 665 Réale D, Garant D, Humphries MM, et al (2010) Personality and the emergence of the pace-of-  
666 life syndrome concept at the population level. *Phil Trans R Soc B* 365:4051–63.  
667 <https://doi.org/10.1098/rstb.2010.0208>
- 668 Rihane A, El Hamoumi R, El Agbani MA, et al (2019) Expansion of the North African ground  
669 squirrel *Atlantoxerus getulus* (Rodentia) along the Moroccan Mid-Atlantic Plains.  
670 *Mammalia* 83:150–156. <https://doi.org/10.1515/mammalia-2017-0150>
- 671 Rolland J, Condamine FL, Jiguet F, Morlon H (2014) Faster speciation and reduced extinction in  
672 the tropics contribute to the mammalian latitudinal diversity gradient. *PLoS Biol* 12:  
673 e1001775. <https://doi.org/10.1371/journal.pbio.1001775>
- 674 Ryan CP, Anderson WG, Gardiner LE, Hare JF (2012) Stress-induced sex ratios in ground  
675 squirrels: Support for a mechanistic hypothesis. *Behav Ecol* 23:160–167.  
676 <https://doi.org/10.1093/beheco/arr169>
- 677 Sæther B, Engen S, Pape Møller A, et al (2004) Life history variation predicts the effects of  
678 demographic stochasticity on avian population dynamics. *Am Nat* 164:793–802.  
679 <https://doi.org/10.1086/425371>
- 680 Signorile AL, Wang J, Lurz PWW, et al (2014) Do founder size, genetic diversity and structure  
681 influence rates of expansion of North American grey squirrels in Europe? *Divers Distrib*  
682 20:918–930. <https://doi.org/10.1111/ddi.12222>
- 683 Sih A, Bell AM, Johnson JC, Ziemba RE (2004) Behavioral syndromes: an integrative overview.  
684 *Q Rev Biol* 79:241–277
- 685 Simberloff D (2009) The role of propagule pressure in biological invasions. *Annu Rev Ecol Evol*  
686 *Syst* 40:81–102. <https://doi.org/10.1146/annurev.ecolsys.110308.120304>
- 687 Simberloff D, Martin JL, Genovesi P, et al (2013) Impacts of biological invasions: What’s what

688 and the way forward. *Trends Ecol Evol* 28:58–66. <https://doi.org/10.1016/j.tree.2012.07.013>

689 Sol D, Bacher S, Reader SM, Lefebvre L (2008) Brain size predicts the success of mammal  
690 species introduced into novel environments. *Am Nat* 172:S63–S71.  
691 <https://doi.org/10.1086/588304>

692 Sol D, Maspons J, Vall-llosera M, et al (2012) Unraveling the life history of successful invaders.  
693 *Science* 337:580–583. <https://doi.org/10.1126/science.1221523>

694 Stearns SC (1983) The influence of size and phylogeny on patterns of covariation among life-  
695 history traits in the mammals. *Oikos* 41:173–187

696 Therneau TM (2015) A package for survival analysis in S. [https://cran.r-](https://cran.r-project.org/package=survival)  
697 [project.org/package=survival](https://cran.r-project.org/package=survival). Accessed 13 Nov 2017

698 Therneau TM, Grambsch PM (2000) Modeling survival data: Extending the Cox model.  
699 *Statistics for Biology and Health*. Springer New York, New York

700 Traveset A, Nogales M, Alcover JA, et al (2009) A review on the effects of alien rodents in the  
701 Balearic (western Mediterranean sea) and Canary islands (eastern Atlantic ocean). *Biol*  
702 *Invasions* 11:1653–1670. <https://doi.org/10.1007/s10530-008-9395-y>

703 Vahsen ML, Shea K, Hovis CL, et al (2018) Prior adaptation, diversity, and introduction  
704 frequency mediate the positive relationship between propagule pressure and the initial  
705 success of founding populations. *Biol Invasions* 20:2451–2459.  
706 <https://doi.org/10.1007/s10530-018-1713-4>

707 van der Marel A (2020) annemarievdmarel/lifehistory\_invasion v1.0. Zenodo.  
708 <http://doi.org/10.5281/zenodo.4136880>

709 van der Marel A, López-Darias M, Waterman JM (2019) Group-enhanced predator detection and  
710 quality of vigilance in a social ground squirrel. *Anim Behav* 151:43-52.



711 <https://doi.org/10.1016/j.anbehav.2019.02.017>

712 van der Marel A, Waterman JM, López-Darias M (2020) Social organization in a North African  
713 ground squirrel. *J Mammal* 101:670–683. <https://doi.org/10.1093/jmammal/gyaa031>

714 van Wilgen NJ, Richardson DM (2012) The roles of climate, phylogenetic relatedness,  
715 introduction effort, and reproductive traits in the establishment of non-native reptiles and  
716 amphibians. *Conserv Biol* 26:267–277. <https://doi.org/10.1111/j.1523-1739.2011.01804.x>

717 Vehtari A, Gelman A, Gabry J (2017) Practical Bayesian model evaluation using leave-one-out  
718 cross-validation and WAIC. *Stat Comput* 27:1413–1432. [https://doi.org/10.1007/s11222-](https://doi.org/10.1007/s11222-016-9696-4)  
719 [016-9696-4](https://doi.org/10.1007/s11222-016-9696-4)

720 Waterman JM (1996) Reproductive biology of a tropical, non-hibernating ground squirrel. *J*  
721 *Mammal* 77:134–146

722 Wood DJA, Koprowski JL, Lurz PWW (2007) Tree squirrel introduction: A theoretical approach  
723 with population viability analysis. *J Mammal* 88:1271–1279. [https://doi.org/10.1644/06-](https://doi.org/10.1644/06-MAMM-A-303.1)  
724 [MAMM-A-303.1](https://doi.org/10.1644/06-MAMM-A-303.1)

725

## Figure legends

**Fig. 1** The native distribution in Morocco and the introduced distribution (Fuerteventura, Canary Islands) of Barbary ground squirrels, *Atlantoxerus getulus*. Distribution map derived from the IUCN Red List Mammals (IUCN 2008)

**Fig. 2** Density plots of a) number of introductions and several life history traits such as b) longevity, c) gestation time, d) weaning age, e) litter size, f) litters per year, g) age at first birth, and h) reproductive lifespan, for all mammals (blue) and all species of the family Sciuridae (including our data for Barbary ground squirrels *Atlantoxerus getulus*) that successfully spread in their introduced range (invasive species) (orange). Dashed lines are the median values for mammals (blue) and squirrels (orange), and the point values for the traits of Barbary ground squirrels (dashed green line)

**Fig. 3** The (a) log number of founders, (b) weaning age, (c) litters per year, and (d) age at first birth for squirrel species that did not successfully spread (not invasive) and that did successfully spread (invasive) into their new geographical range. The dark line is the median, the box edges are the upper and lower quartiles, the whiskers are 50% from the median, and the closed circles are the outliers, calculated as the values smaller or larger than 1.5 times the box length (i.e., upper-lower quantile). Note the non-standardized y-values

**Fig. 4** The posterior uncertainty intervals of the parameter estimates ( $\beta$ ) of introduction effort and life history traits. The thick segments are the 50% intervals, and the thinner outer lines are the 95% intervals. The distributions that cross zero have a negligible effect on invasion status, whereas distributions that do not contain zero have a strong effect on invasion status. Plot designed using the 'bayesplot' package (Gabry et al. 2019)

**Table 1** Life history traits median values and sample size (*N*) for all mammals, the species of the family Sciuridae (squirrels, including Barbary ground squirrels *A. getulus*) that successfully spread in their introduced range (invasive species), and the Barbary ground squirrels only

|                               | Mammals <sup>a</sup> |        | Only squirrels <sup>a</sup> |                  | <i>A. getulus</i> only |        |
|-------------------------------|----------------------|--------|-----------------------------|------------------|------------------------|--------|
|                               | <i>N</i>             | median | <i>N</i>                    | median           | <i>N</i>               | median |
| Introduction effort           | 47                   | 26     | 6                           | 11               | 1                      | 1      |
| Body mass (g)                 | 47                   | 6361.6 | 5                           | 349.6            | 1                      | 220    |
| Neonatal body mass (g)        | 47                   | 113.0  | 4                           | 8.8              | 1                      | 8.0    |
| Litter size                   | 47                   | 2.3    | 5                           | 3.8              | 1                      | 3.0    |
| Litters per year              | 47                   | 1      | 6                           | 2                | 1                      | 1      |
| Age at first birth (days)     | 45                   | 403.3  | 5                           | 357.5            | 1                      | 350.3  |
| Gestation time (days)         | 47                   | 66.4   | 5                           | 41.4             | 1                      | 42.0   |
| Weaning age (days)            | 45                   | 60.9   | 5                           | 54.8             | 1                      | 67     |
| Longevity (years)             | 47                   | 20.0   | 5                           | 7 <sup>b</sup>   | 1                      | 5      |
| Reproductive lifespan (years) | 45                   | 18.3   | 5                           | 6.3 <sup>b</sup> | 1                      | 4.1    |

<sup>a</sup> Life history traits adopted from Capellini et al. (2015), who derived the life history data from the PanTHERIA database (Jones et al. 2009), except for the *A. getulus* data.

<sup>b</sup> In the dataset of Capellini et al. (2015) longevity for the species in captivity was provided if longevity was not known for the species in the wild, which overestimates longevity and the derived reproductive lifespan. We changed the longevity of gray squirrels to 12.5, red squirrels to 7 (Barkalow and Soots 1975) and Siberian chipmunks to 6 years (Chapuis et al. 2011).

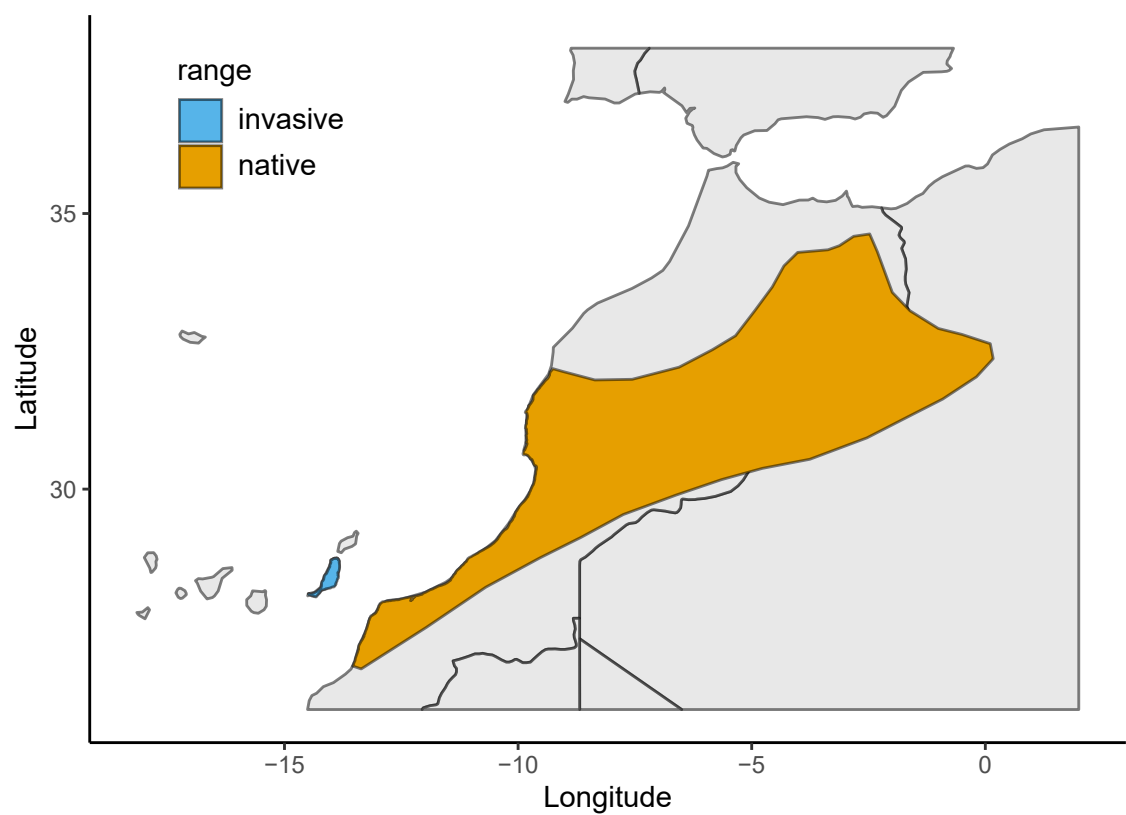

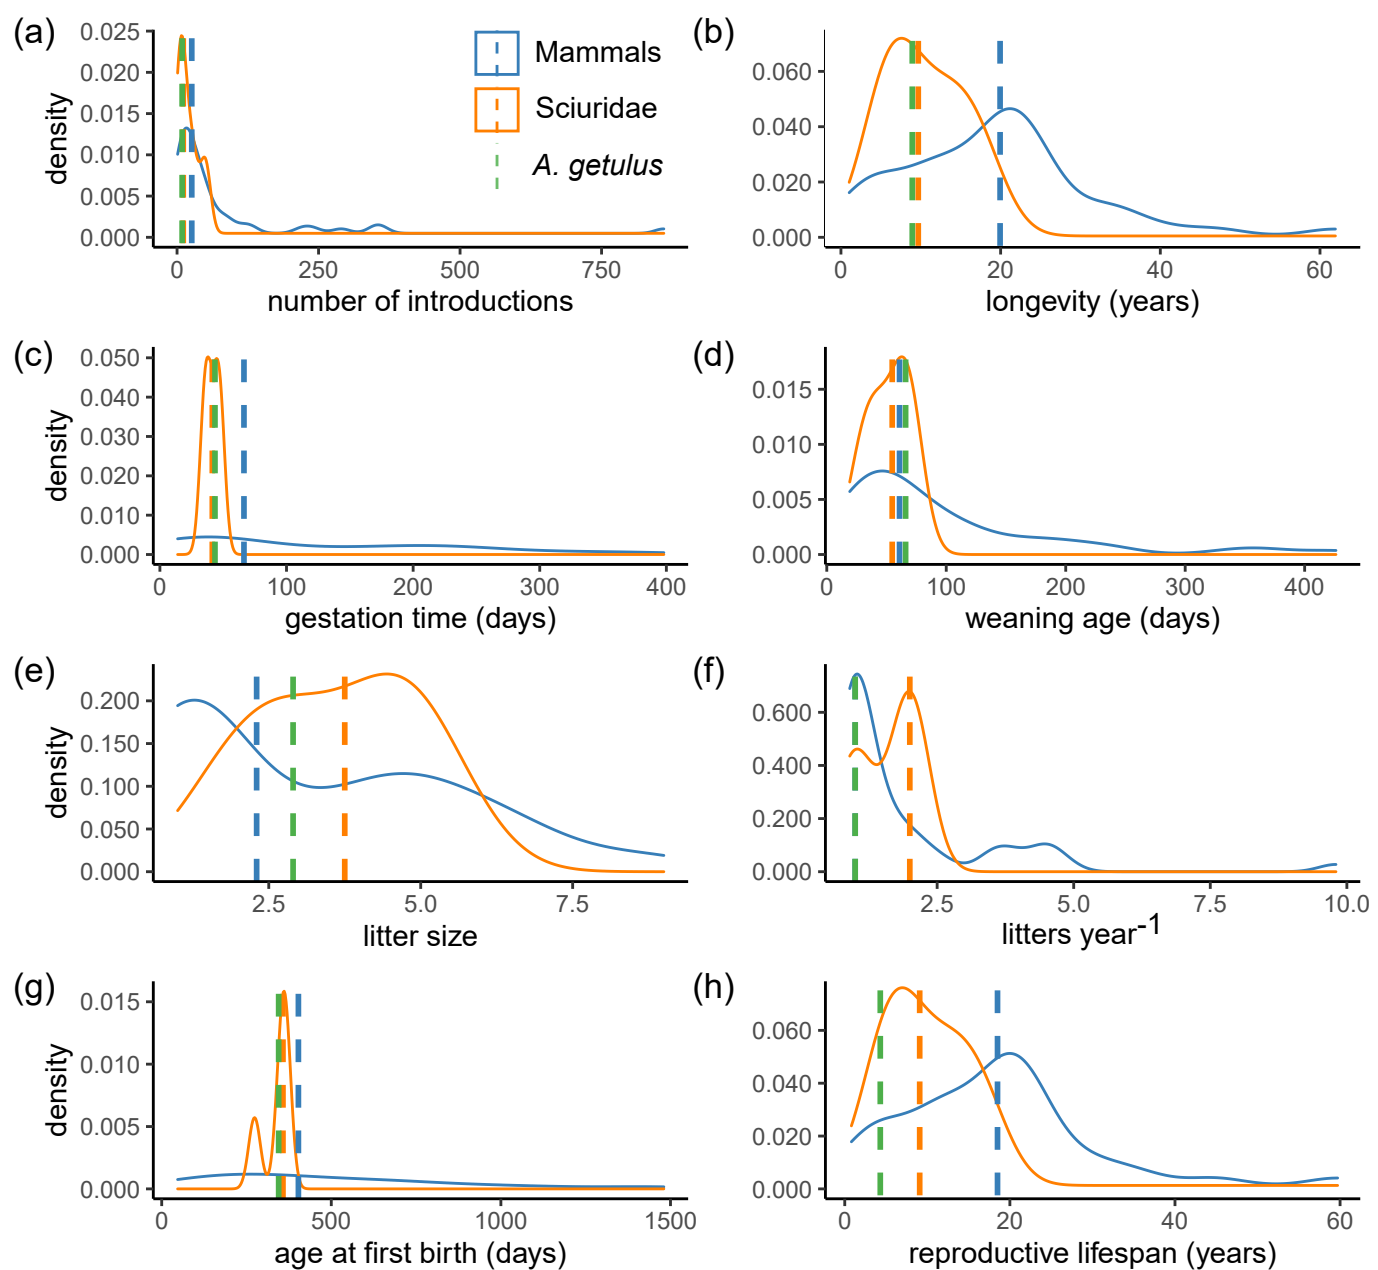

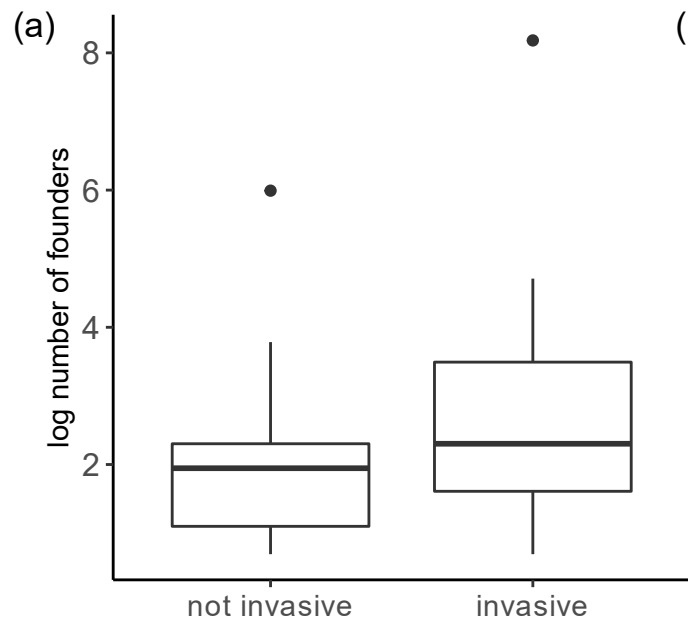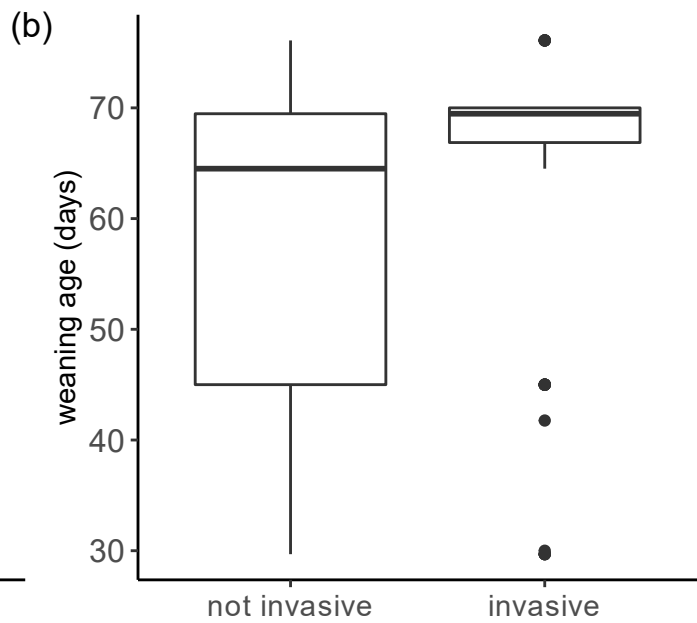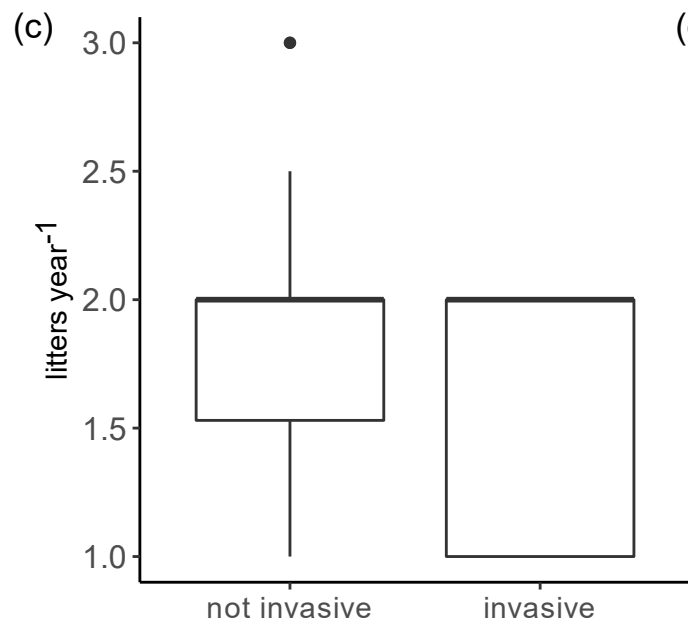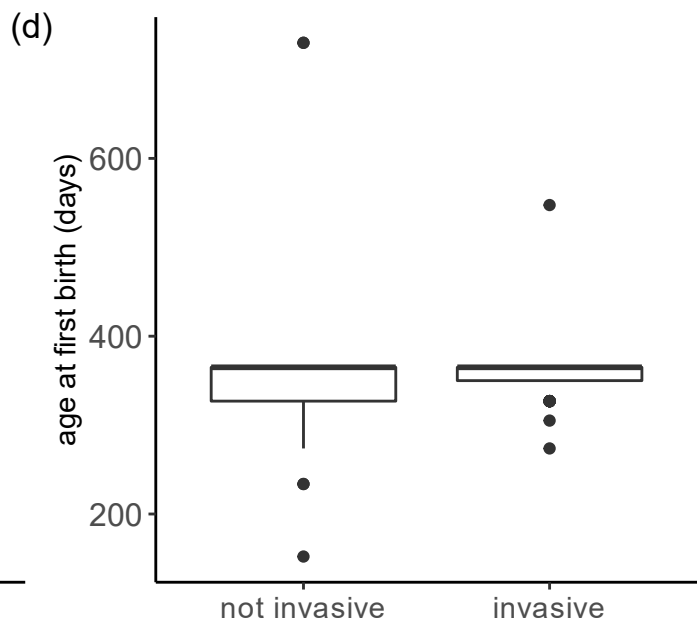

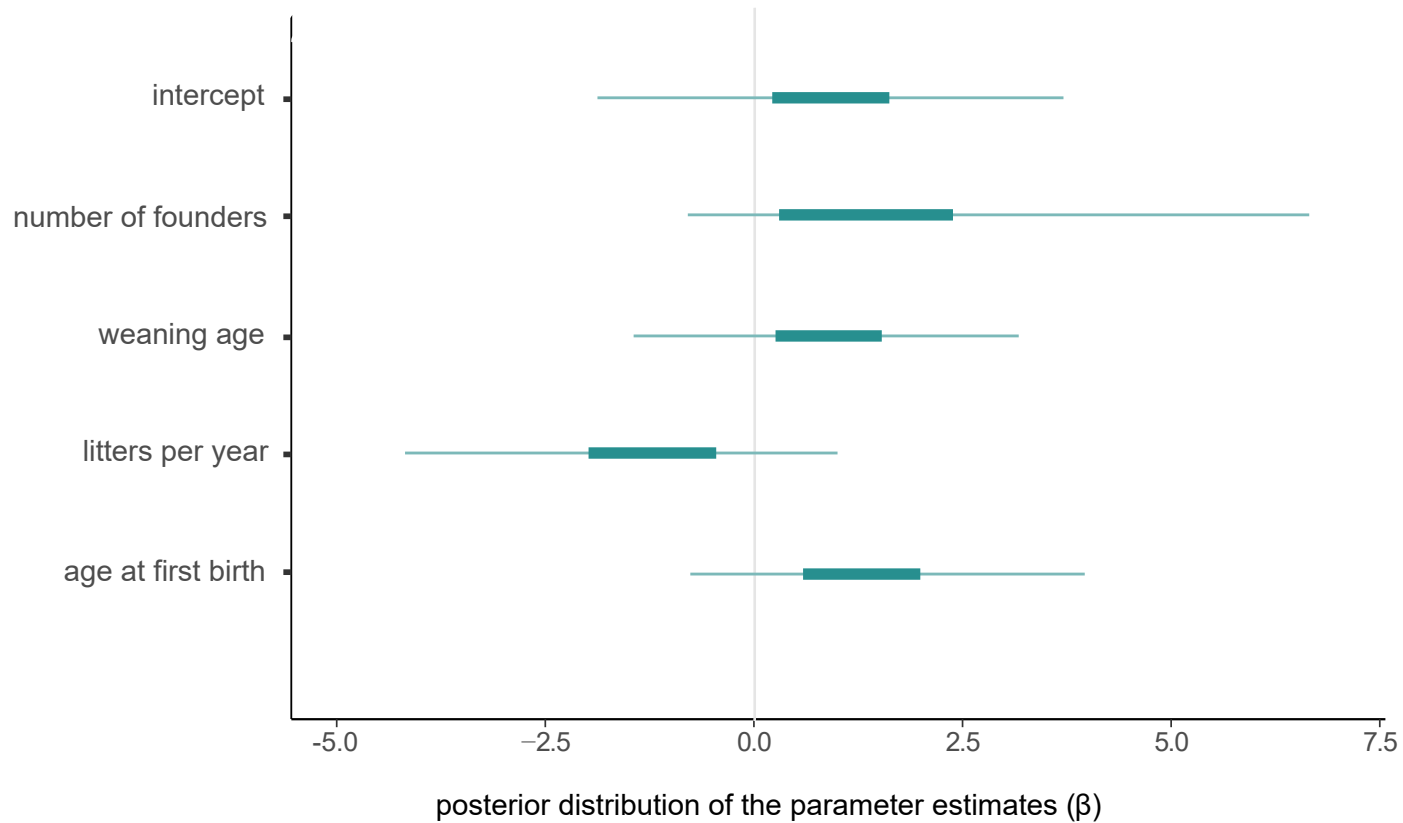

Source: https://www.biorxiv.org/content/10.1101/2020.10.27.357319v2.full.pdf
